# Supplementary material
Source: PubMed Central journal article supplement (PMC2811049)

# Supporting Information

for

## Chemoenzymatic synthesis of GD3 oligosaccharides and other disialyl glycans containing natural and non-natural sialic acids

*Hai Yu, Jiansong Cheng, Li Ding, Zahra Khedri, Yi Chen, Sharlene Chin, Kam Lau,*

*Vinod Kumar Tiwari, and Xi Chen\**

Department of Chemistry, University of California, Davis, One Shields Avenue, Davis, CA 95616 USA

E-mail: chen@chem.ucdavis.edu

### Table of Contents

|                                                                                                                                 |     |
|---------------------------------------------------------------------------------------------------------------------------------|-----|
| <sup>1</sup> H and <sup>13</sup> C NMR spectra for Neu5Ac9N <sub>3</sub> α2–3GalβOMe ( <b>23</b> ).....                         | S2  |
| <sup>1</sup> H and <sup>13</sup> C NMR spectra for KDN5Meα2–3LacβProN <sub>3</sub> ( <b>27</b> ).....                           | S3  |
| <sup>1</sup> H and <sup>13</sup> C NMR spectra for Neu5Acα2–8Neu5Acα2–3LacβProN <sub>3</sub> ( <b>4</b> ).....                  | S4  |
| <sup>1</sup> H and <sup>13</sup> C NMR spectra for Neu5Gcα2–8Neu5Acα2–3LacβProN <sub>3</sub> ( <b>6</b> ).....                  | S5  |
| <sup>1</sup> H and <sup>13</sup> C NMR spectra for KDNα2–8Neu5Acα2–3LacβProN <sub>3</sub> ( <b>8</b> ).....                     | S6  |
| <sup>1</sup> H and <sup>13</sup> C NMR spectra for Neu5GcMeα2–8Neu5Acα2–3LacβProN <sub>3</sub> ( <b>10</b> ).....               | S7  |
| <sup>1</sup> H and <sup>13</sup> C NMR spectra for Neu5AcN <sub>3</sub> α2–8Neu5Acα2–3LacβProN <sub>3</sub> ( <b>12</b> ).....  | S8  |
| <sup>1</sup> H and <sup>13</sup> C NMR spectra for Neu5Ac9N <sub>3</sub> α2–8Neu5Acα2–3LacβProN <sub>3</sub> ( <b>14</b> )..... | S9  |
| <sup>1</sup> H and <sup>13</sup> C NMR spectra for Neu5,9Ac <sub>2</sub> α2–8Neu5Acα2–3LacβProN <sub>3</sub> ( <b>16</b> )..... | S10 |
| <sup>1</sup> H and <sup>13</sup> C NMR spectra for Neu5Gc9Acα2–8Neu5Acα2–3LacβProN <sub>3</sub> ( <b>18</b> ).....              | S11 |
| <sup>1</sup> H and <sup>13</sup> C NMR spectra for Neu5Acα2–8Neu5Gcα2–3LacβProN <sub>3</sub> ( <b>20</b> ).....                 | S12 |
| <sup>1</sup> H and <sup>13</sup> C NMR spectra for Neu5Acα2–8KDNα2–3LacβProN <sub>3</sub> ( <b>22</b> ).....                    | S13 |
| <sup>1</sup> H and <sup>13</sup> C NMR spectra for Neu5Acα2–8Neu5Ac9N <sub>3</sub> α2–3GalβOMe ( <b>24</b> ).....               | S14 |
| <sup>1</sup> H and <sup>13</sup> C NMR spectra for Neu5Gcα2–8Neu5Gcα2–3LacβProN <sub>3</sub> ( <b>28</b> ).....                 | S15 |
| <sup>1</sup> H and <sup>13</sup> C NMR spectra for KDNα2–8Neu5Gcα2–3LacβProN <sub>3</sub> ( <b>29</b> ).....                    | S16 |
| <sup>1</sup> H and <sup>13</sup> C NMR spectra for Neu5Gcα2–8KDNα2–3LacβProN <sub>3</sub> ( <b>30</b> ).....                    | S17 |
| <sup>1</sup> H and <sup>13</sup> C NMR spectra for KDNα2–8KDNα2–3LacβProN <sub>3</sub> ( <b>31</b> ).....                       | S18 |
| <sup>1</sup> H and <sup>13</sup> C NMR spectra for Neu5Acα2–8Neu5Acα2–6LacβProN <sub>3</sub> ( <b>34</b> ).....                 | S19 |
| <sup>1</sup> H and <sup>13</sup> C NMR spectra for Neu5Acα2–8Neu5Gcα2–6LacβProN <sub>3</sub> ( <b>36</b> ).....                 | S20 |
| <sup>1</sup> H and <sup>13</sup> C NMR spectra for Neu5Acα2–8KDNα2–6LacβProN <sub>3</sub> ( <b>38</b> ).....                    | S21 |
| <sup>1</sup> H and <sup>13</sup> C NMR spectra for Neu5Acα2–8Neu5Ac9N <sub>3</sub> α2–6GalβOMe ( <b>40</b> ).....               | S22 |

$^1\text{H}$  and  $^{13}\text{C}$  NMR for Neu5Ac9N $_3\alpha$ 2-3Gal $\beta$ OMe (**23**)

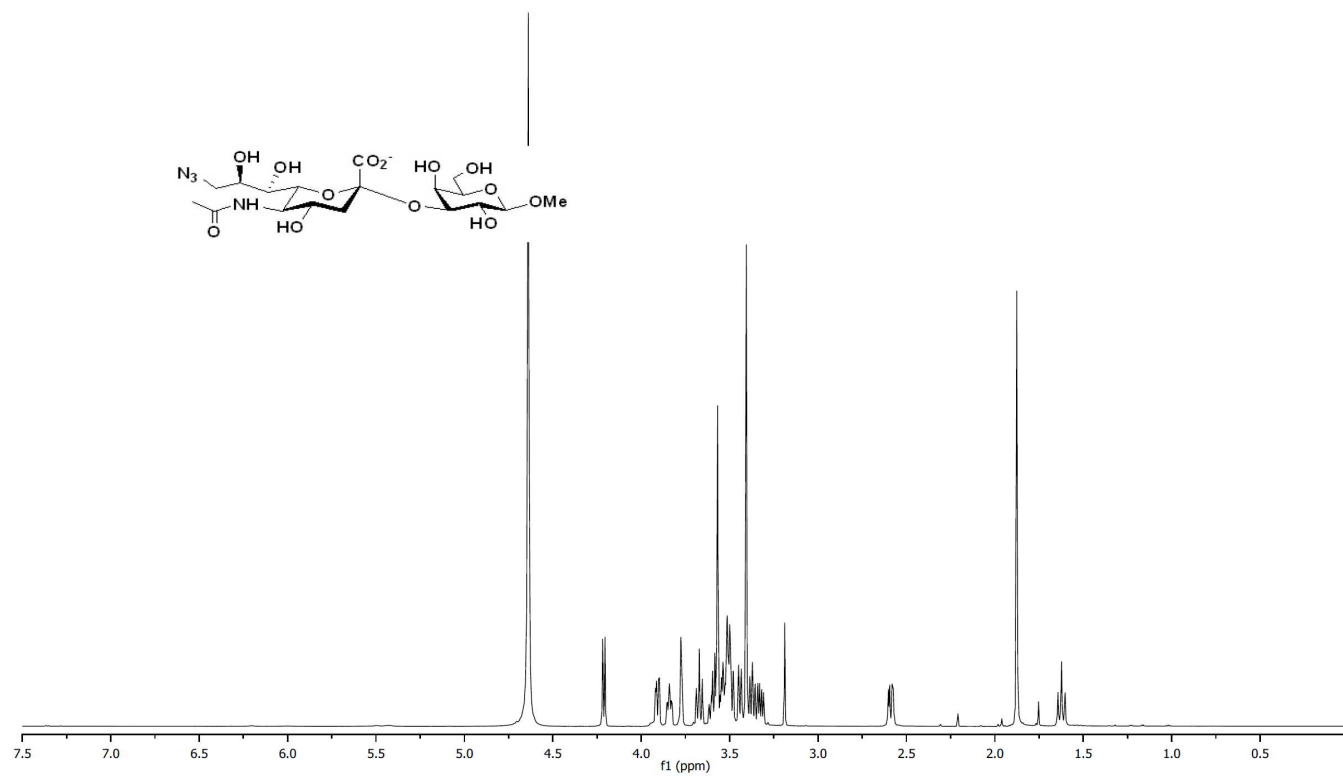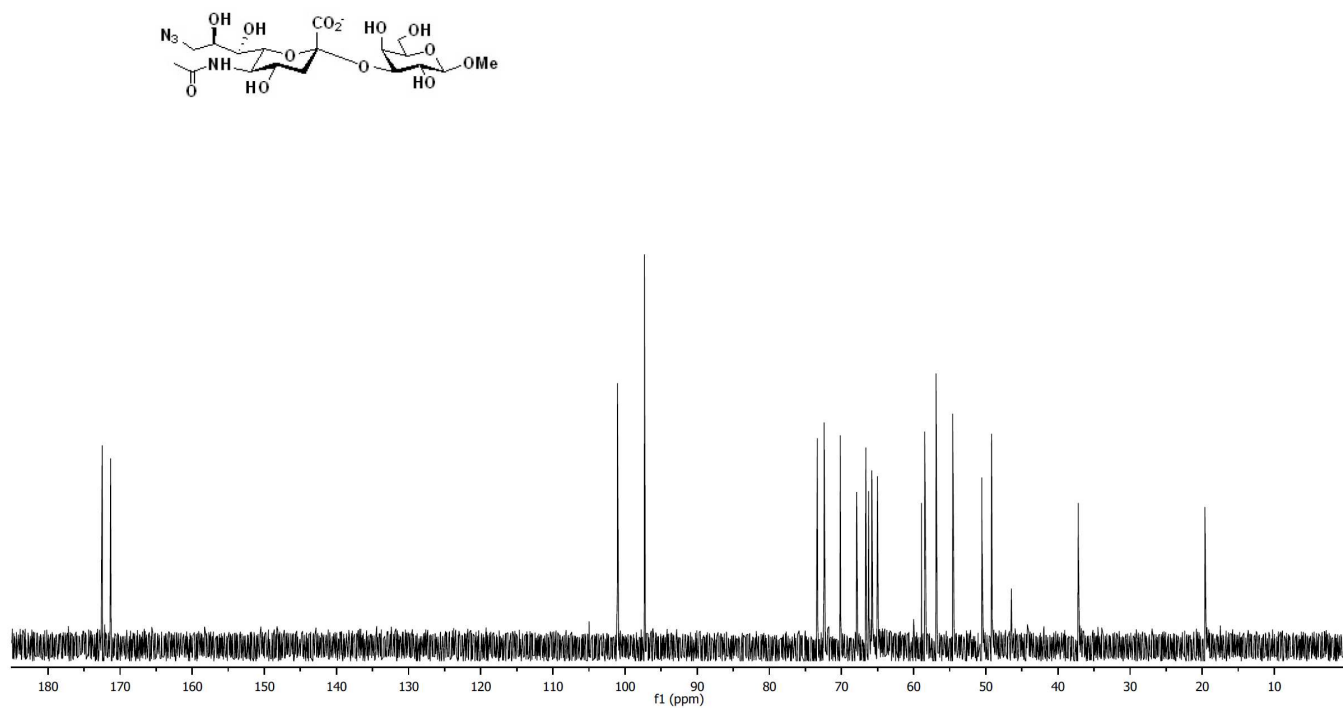

$^1\text{H}$  and  $^{13}\text{C}$  NMR for KDN5Me $\alpha$ 2-3Lac $\beta$ ProN $_3$  (**27**)

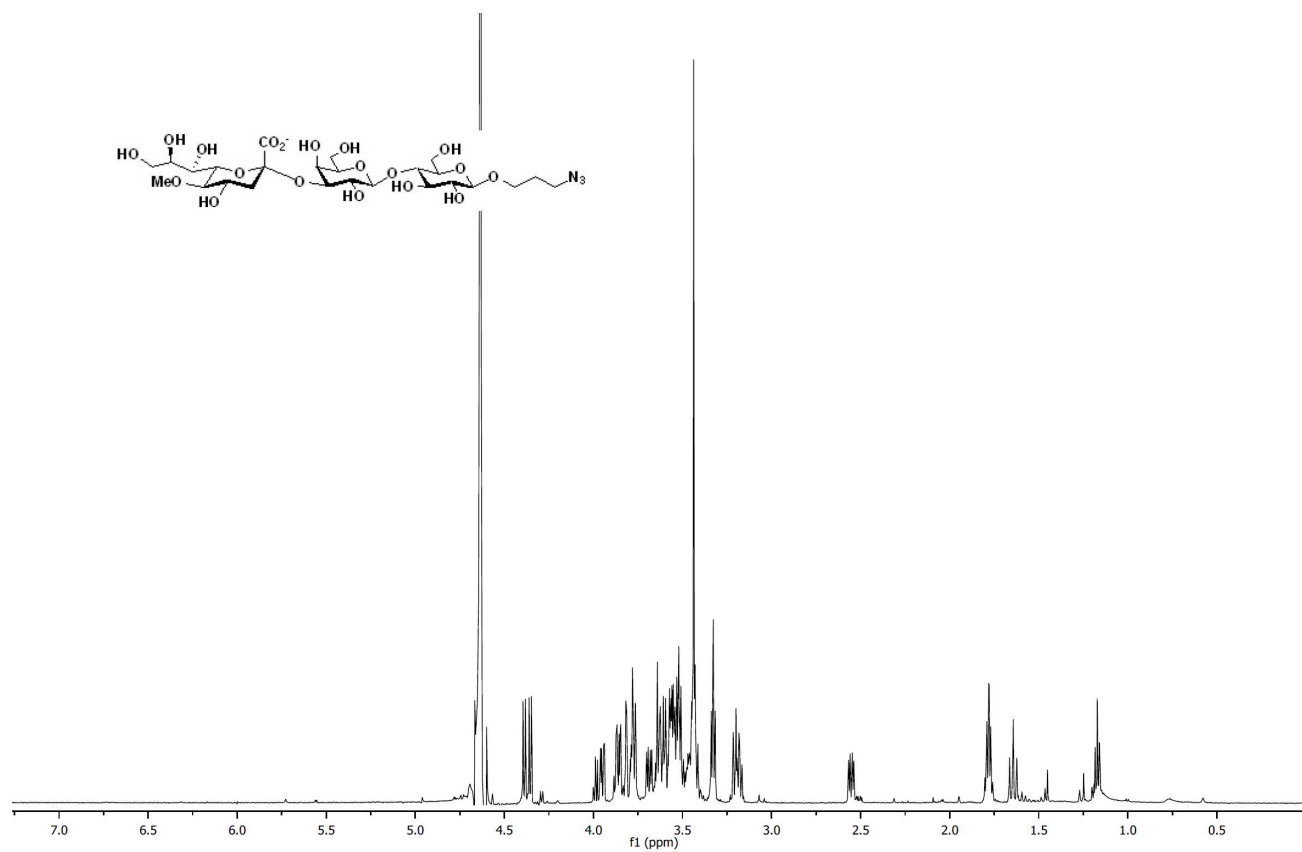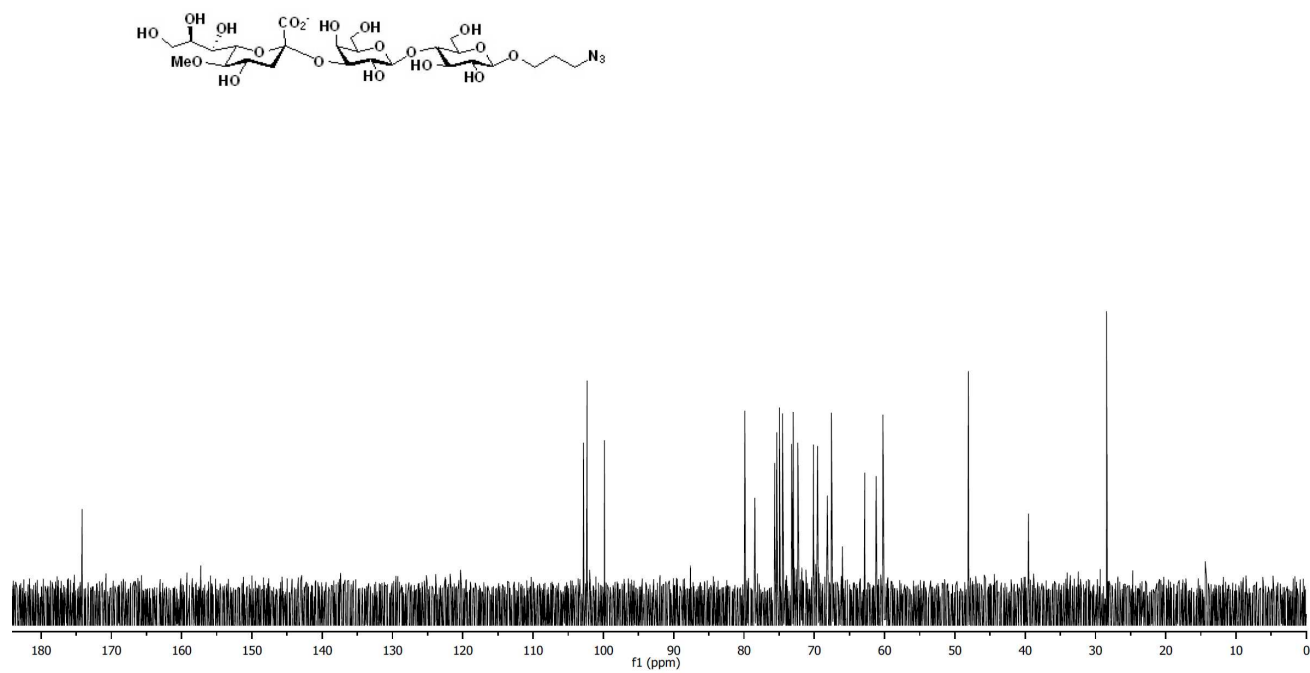

$^1\text{H}$  and  $^{13}\text{C}$  NMR for Neu5Ac $\alpha$ 2-8Neu5Ac $\alpha$ 2-3Lac $\beta$ ProN $_3$  (**4**)

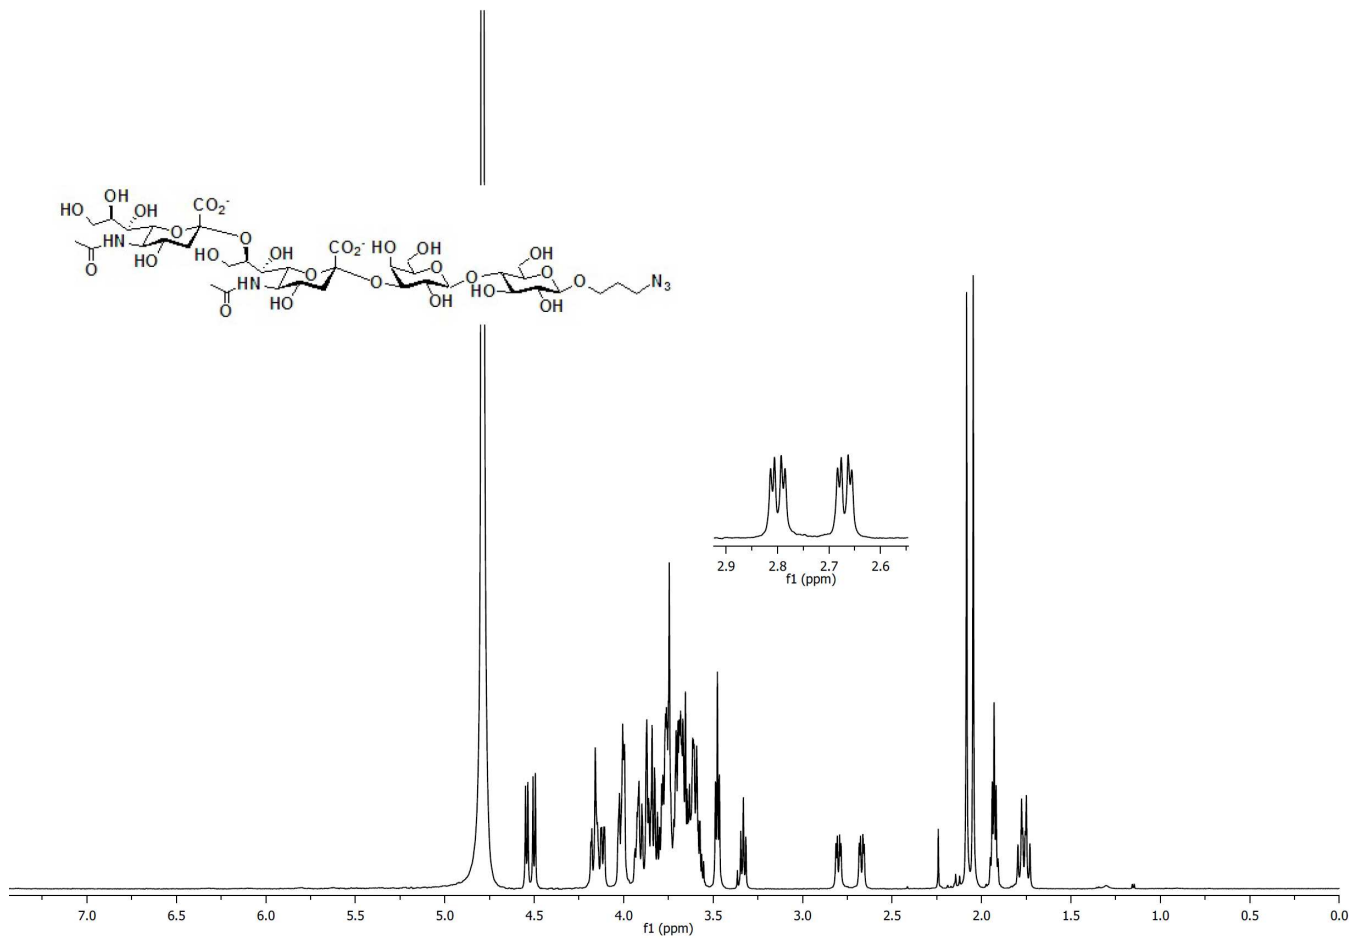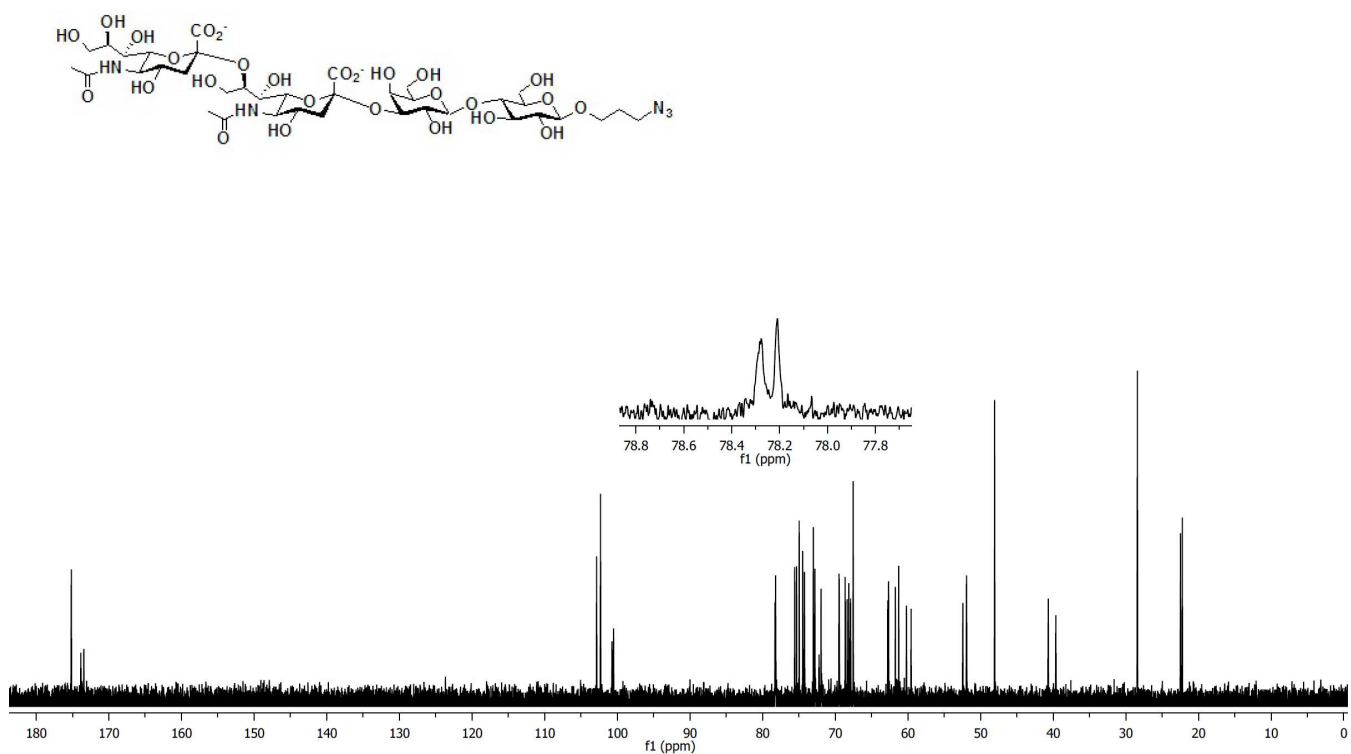

$^1\text{H}$  and  $^{13}\text{C}$  NMR for Neu5Gc $\alpha$ 2-8Neu5Ac $\alpha$ 2-3Lac $\beta$ ProN $_3$  (**6**)

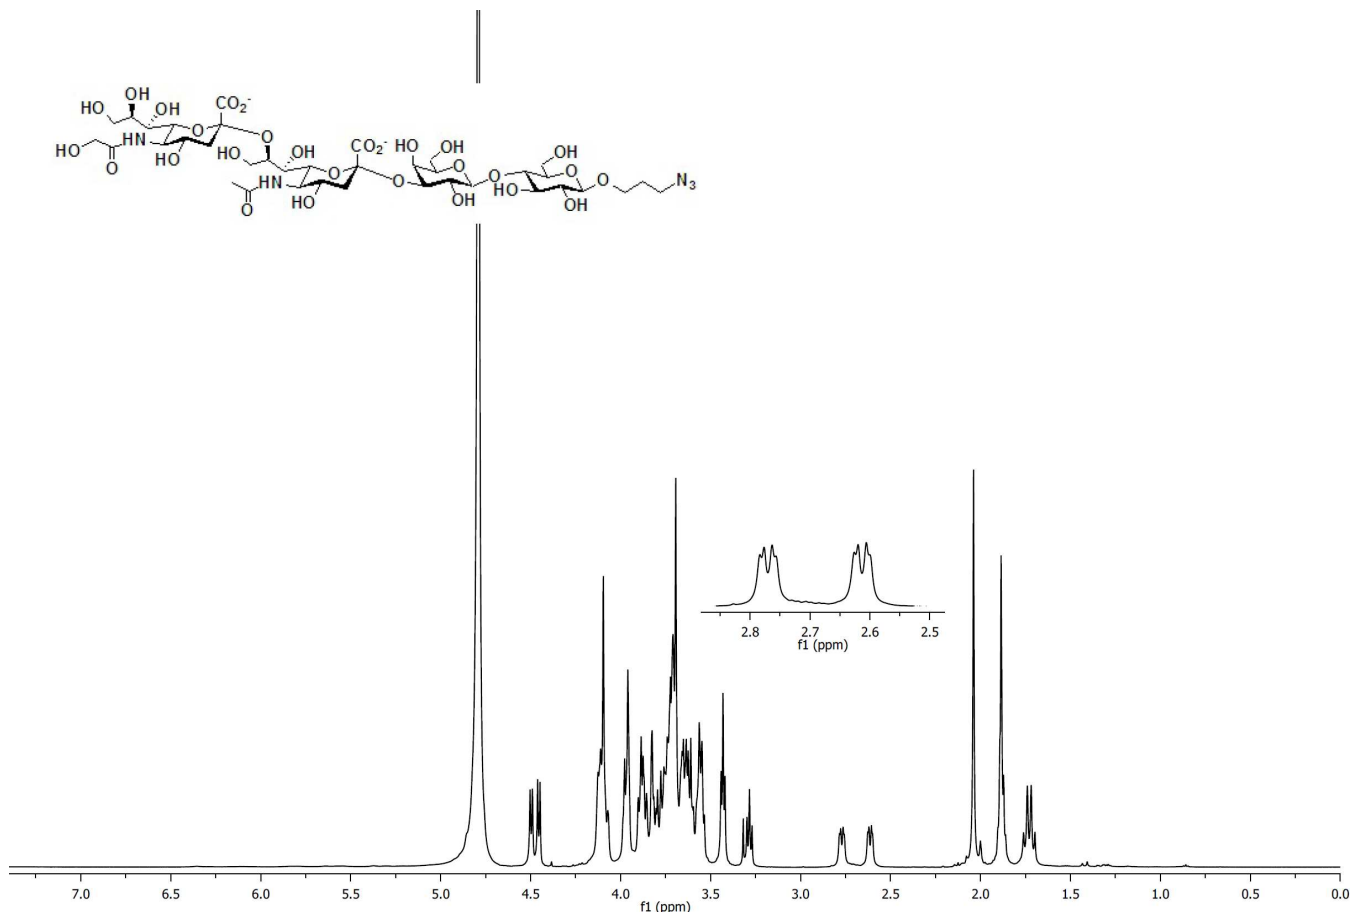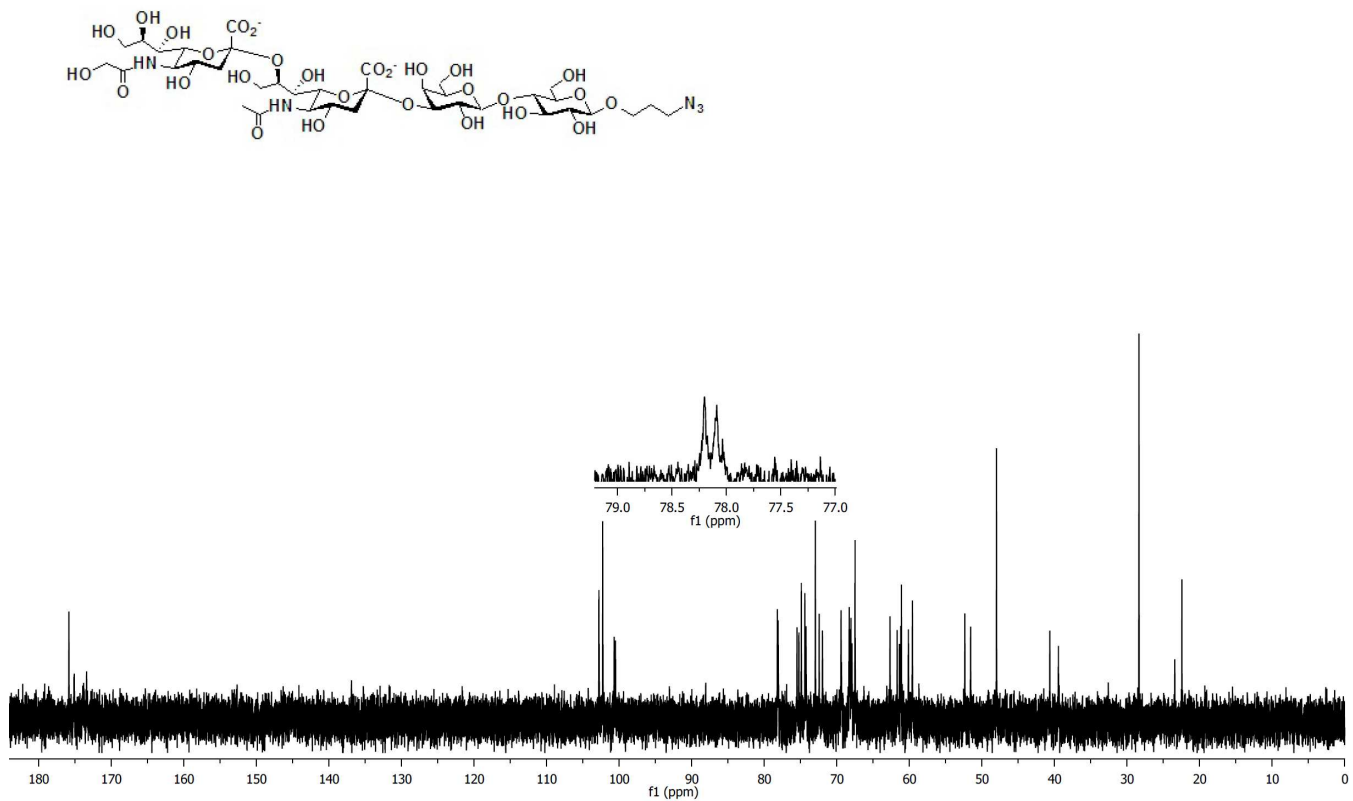

$^1\text{H}$  and  $^{13}\text{C}$  NMR for  $\text{KDN}\alpha 2\text{-}8\text{Neu5Ac}\alpha 2\text{-}3\text{Lac}\beta\text{ProN}_3$  (**8**)

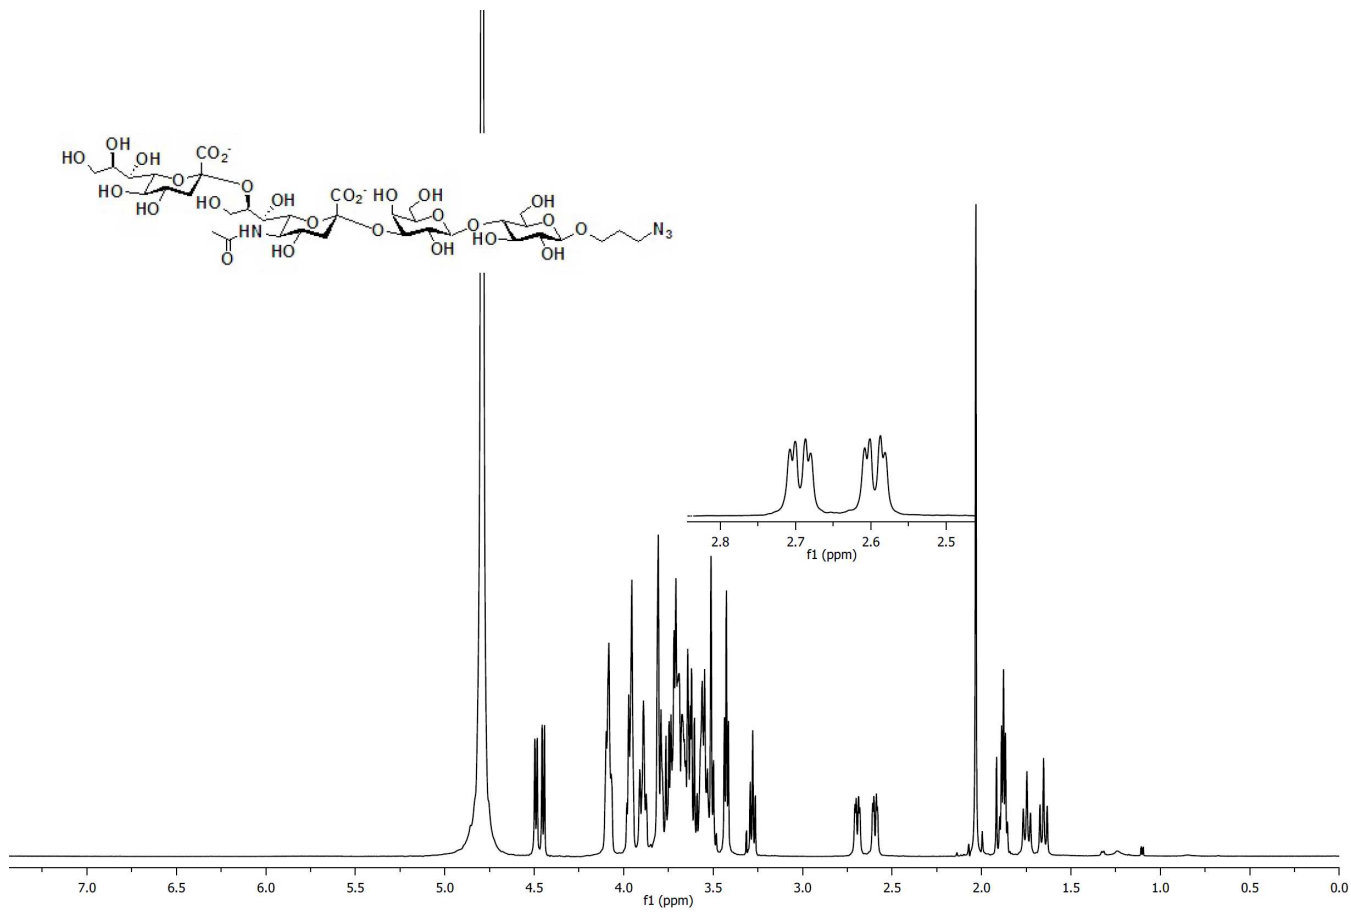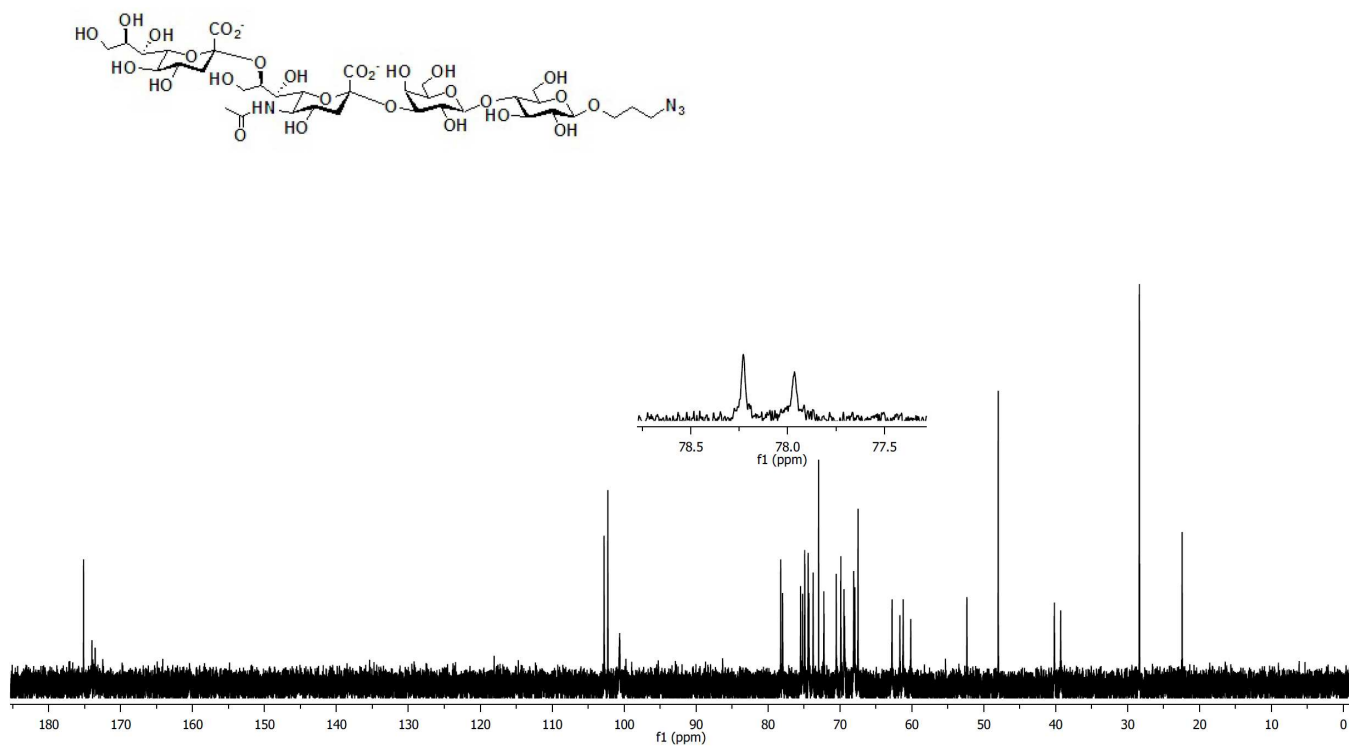

$^1\text{H}$  and  $^{13}\text{C}$  NMR for Neu5GcMe $\alpha$ 2-8Neu5Ac $\alpha$ 2-3Lac $\beta$ ProN $_3$  (**10**)

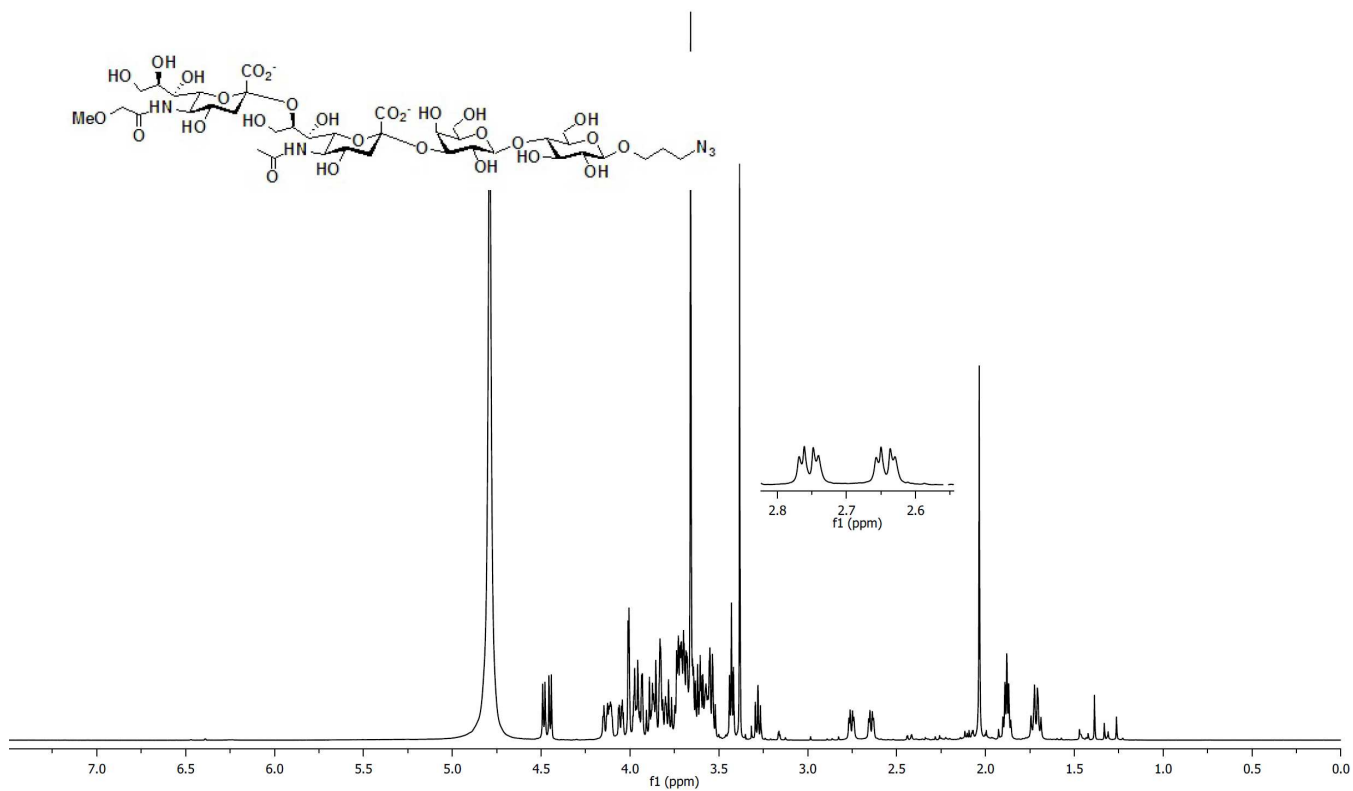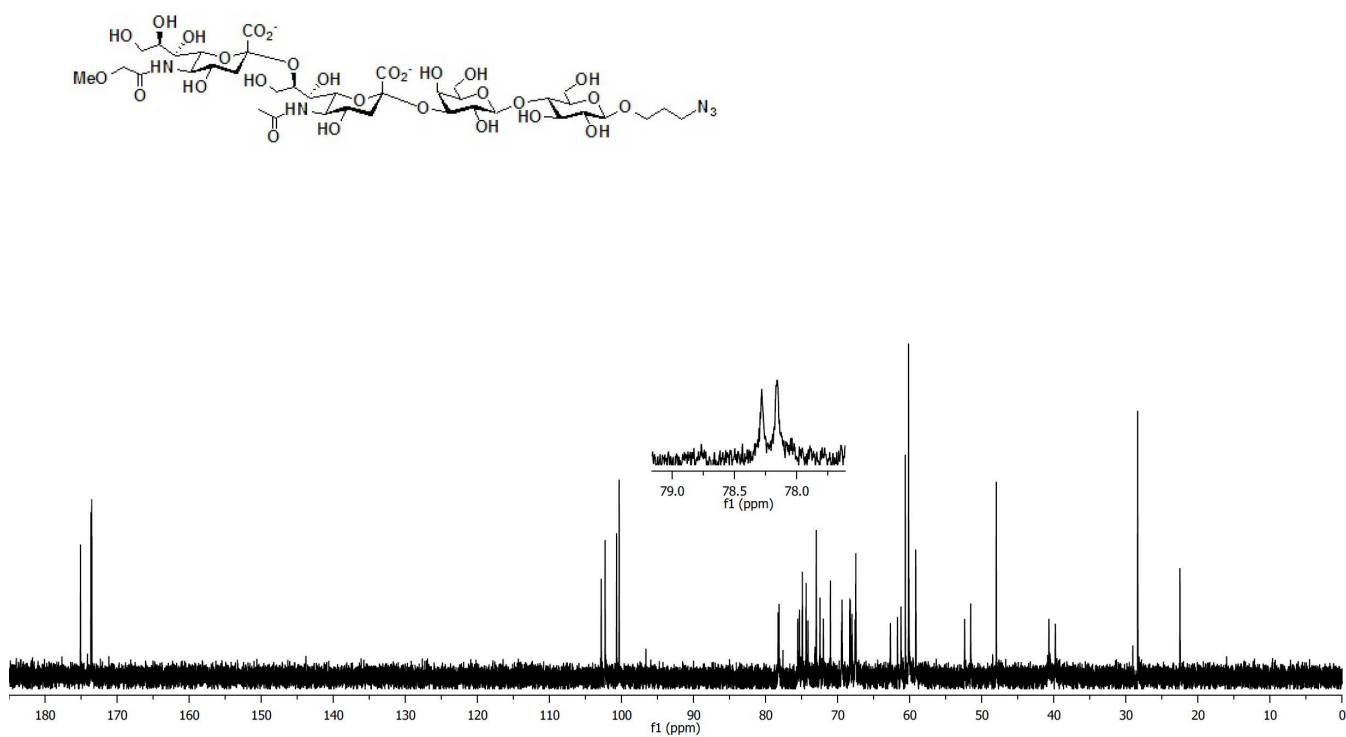

$^1\text{H}$  and  $^{13}\text{C}$  NMR for Neu5AcN<sub>3</sub> $\alpha$ 2-8Neu5Ac $\alpha$ 2-3Lac $\beta$ ProN<sub>3</sub> (**12**)

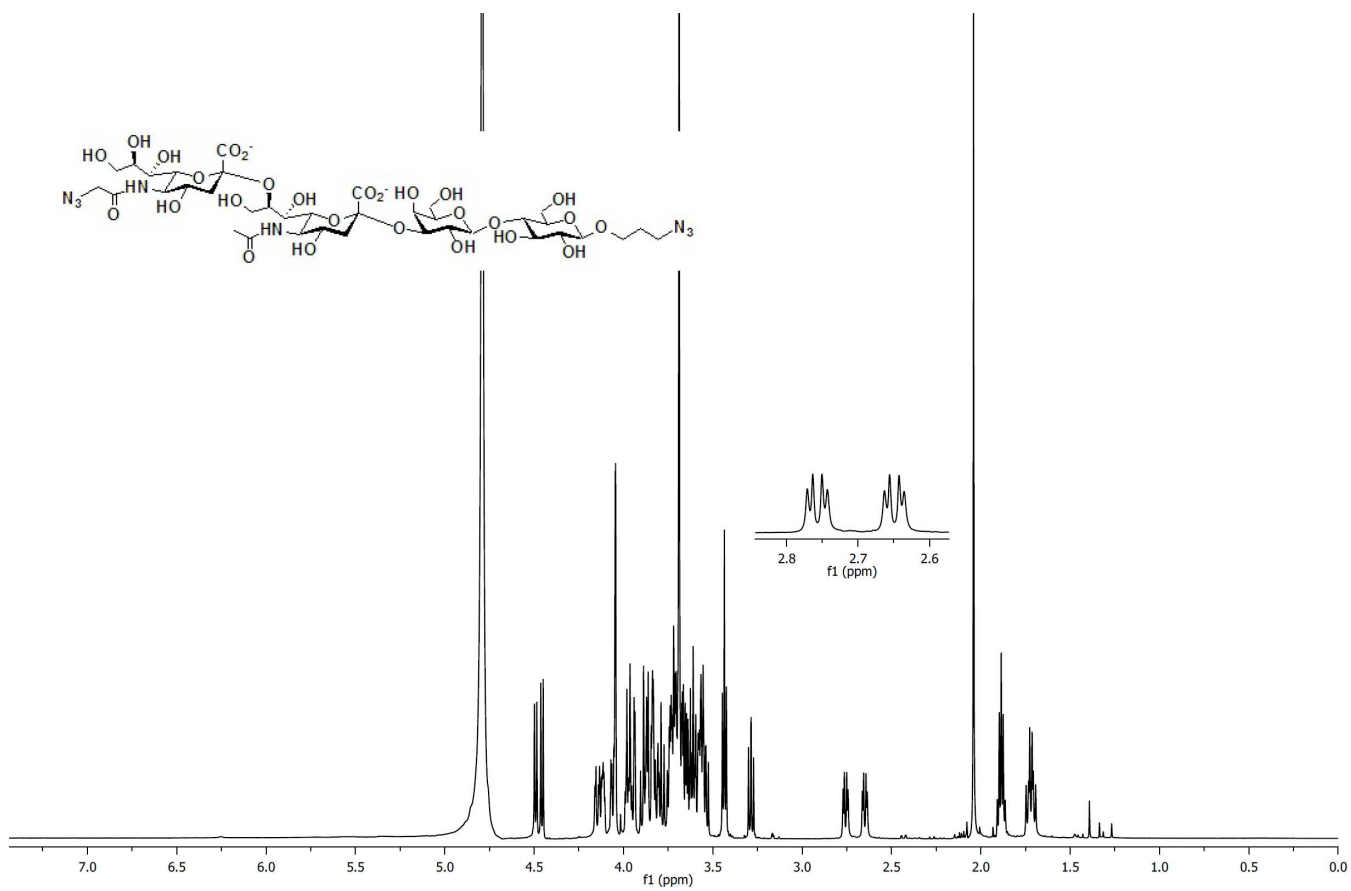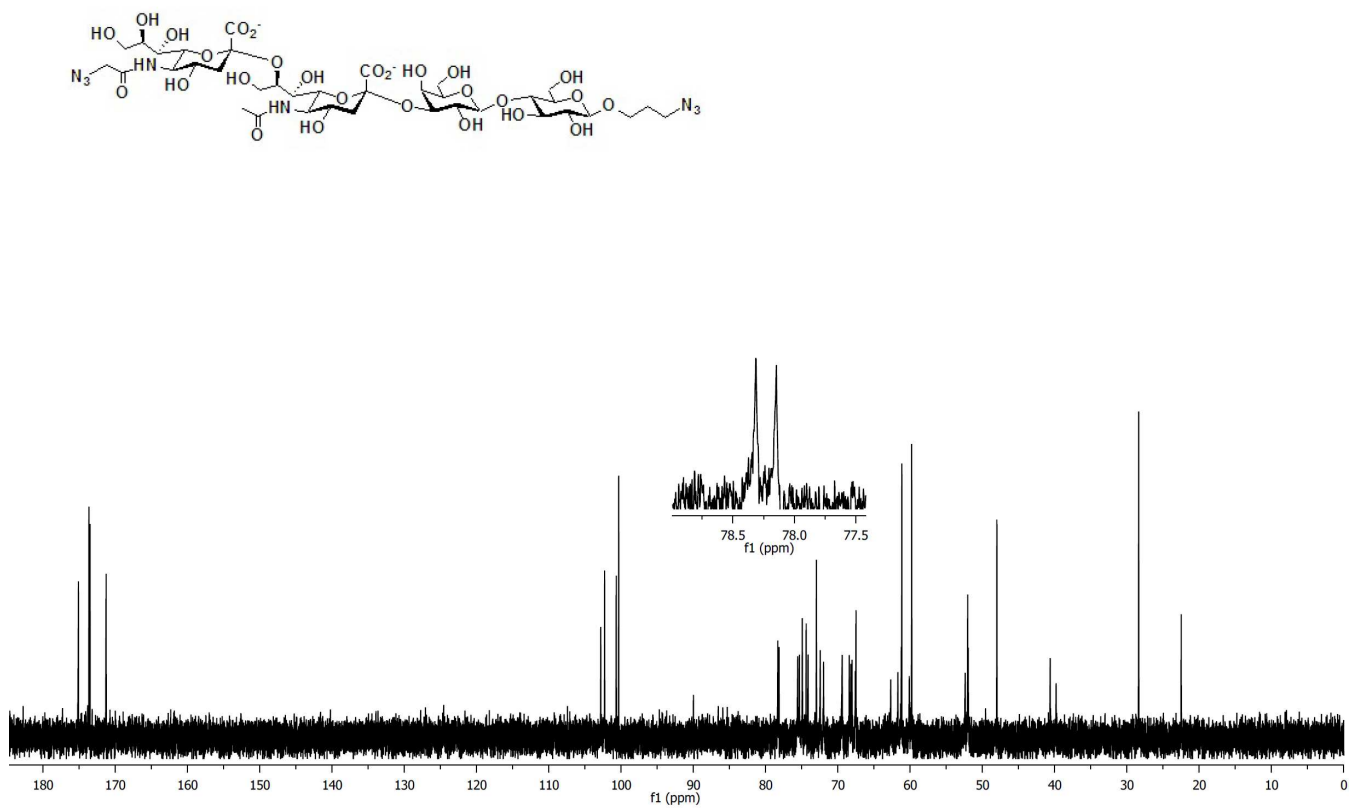



$^1\text{H}$  and  $^{13}\text{C}$  NMR for Neu5Ac9N $_3\alpha$ 2-8Neu5Ac $\alpha$ 2-3Lac $\beta$ ProN $_3$  (**14**)

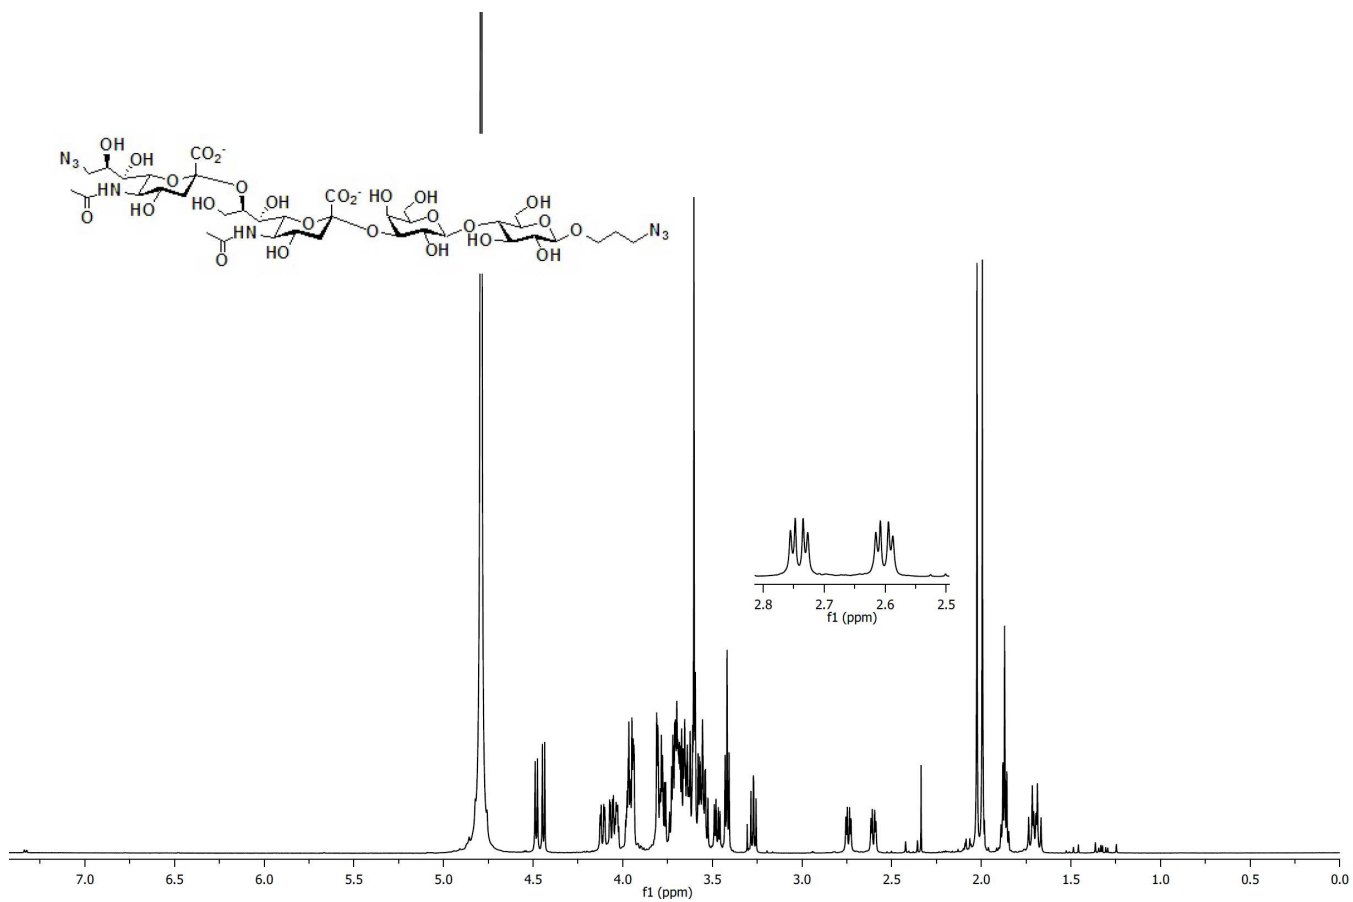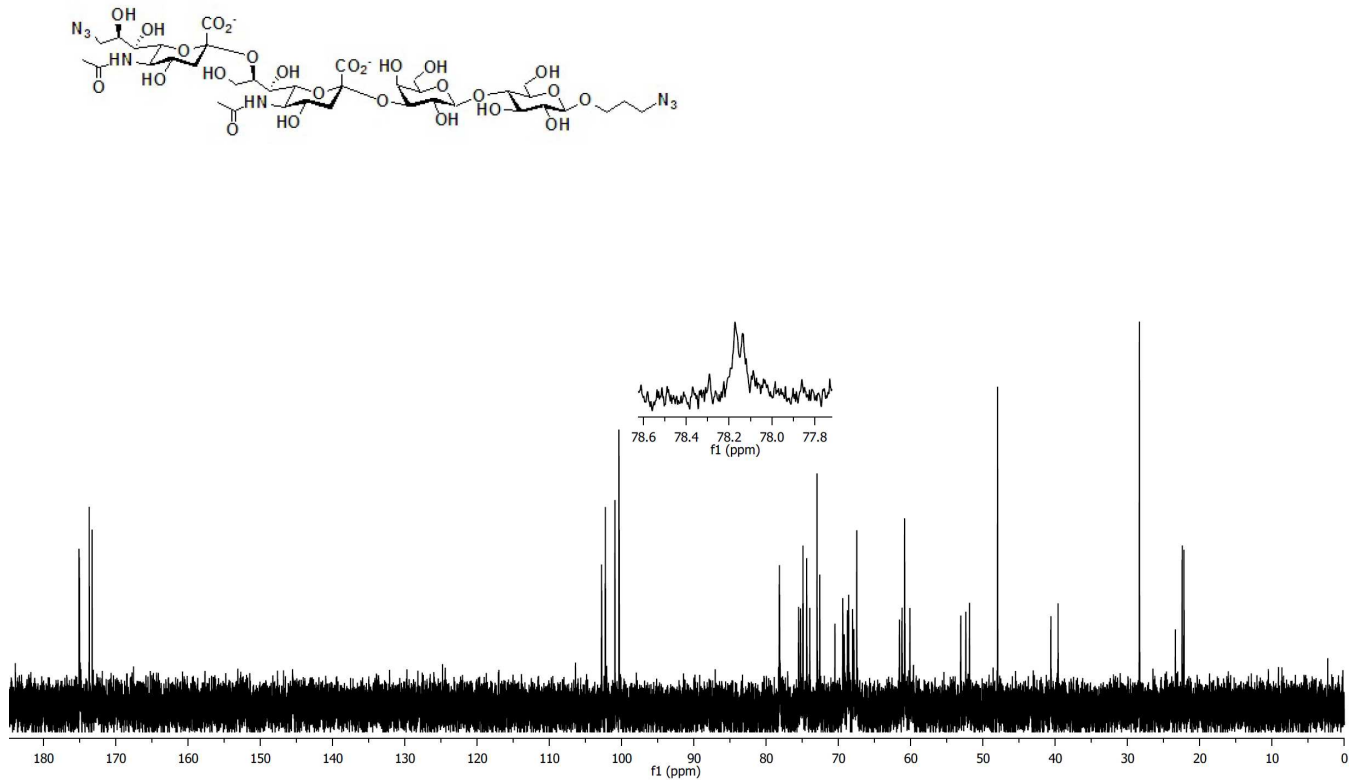

$^1\text{H}$  and  $^{13}\text{C}$  NMR for Neu5,9Ac $\alpha$ 2-8Neu5Ac $\alpha$ 2-3Lac $\beta$ ProN $_3$  (**16**)

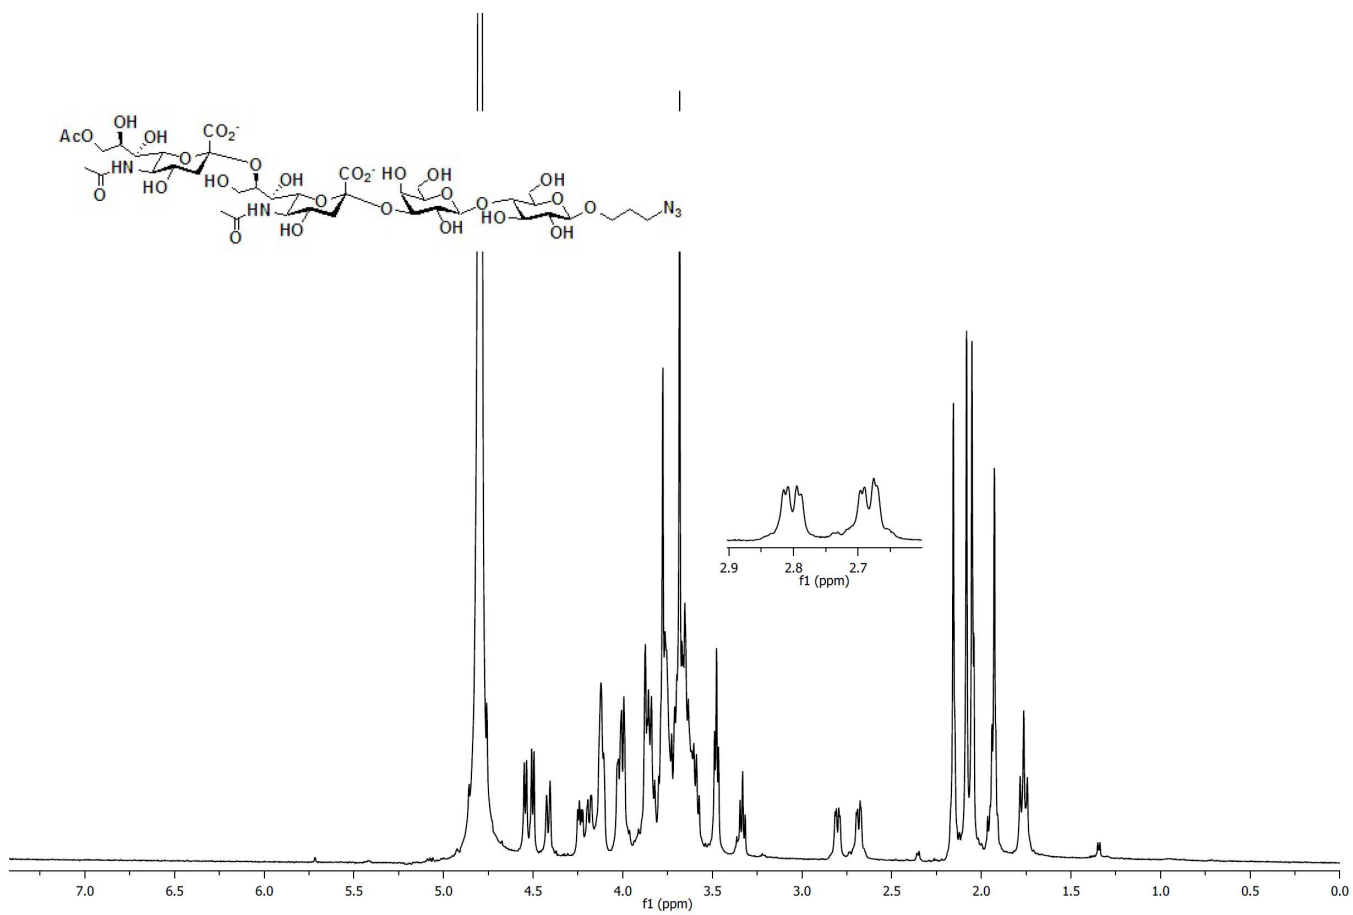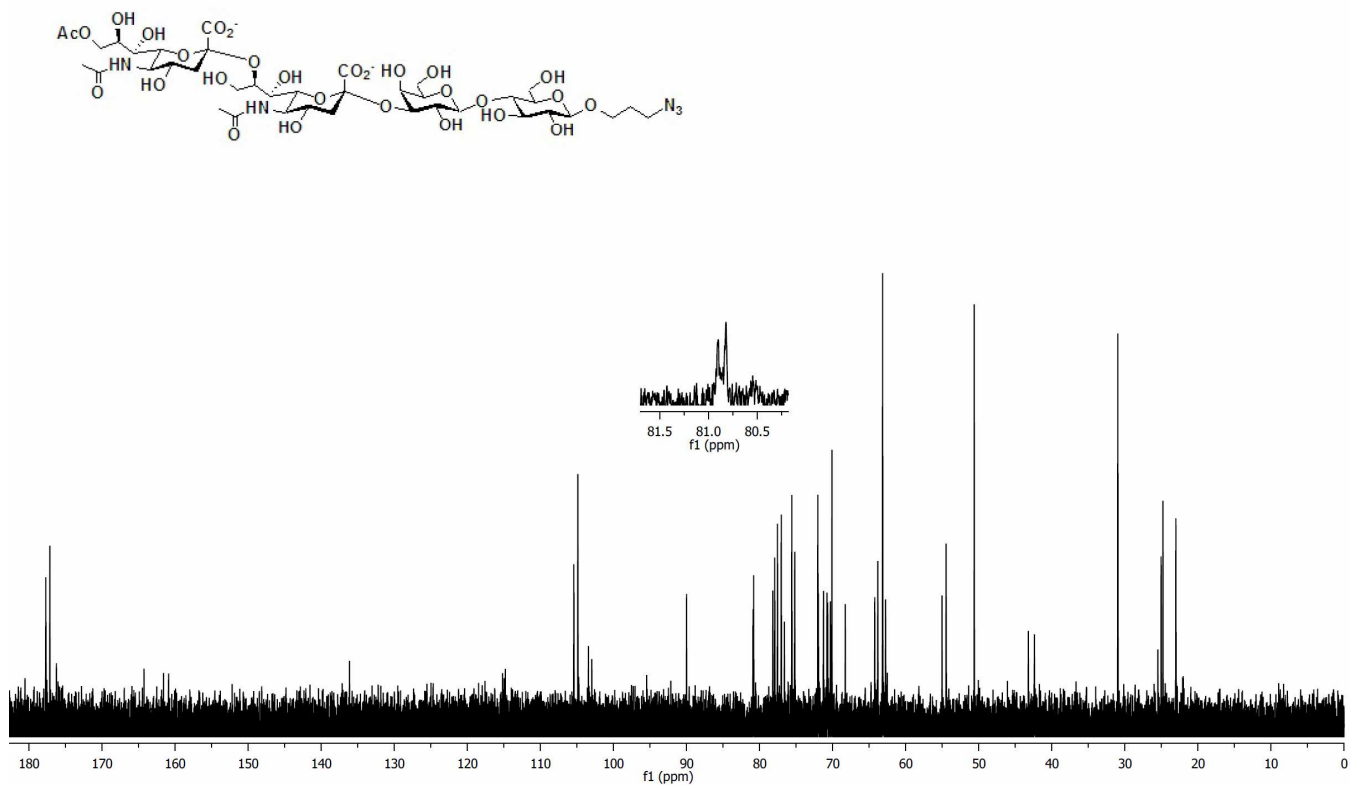

$^1\text{H}$  and  $^{13}\text{C}$  NMR for Neu5Gc9Ac $\alpha$ 2-8Neu5Ac $\alpha$ 2-3Lac $\beta$ ProN $_3$  (**18**)

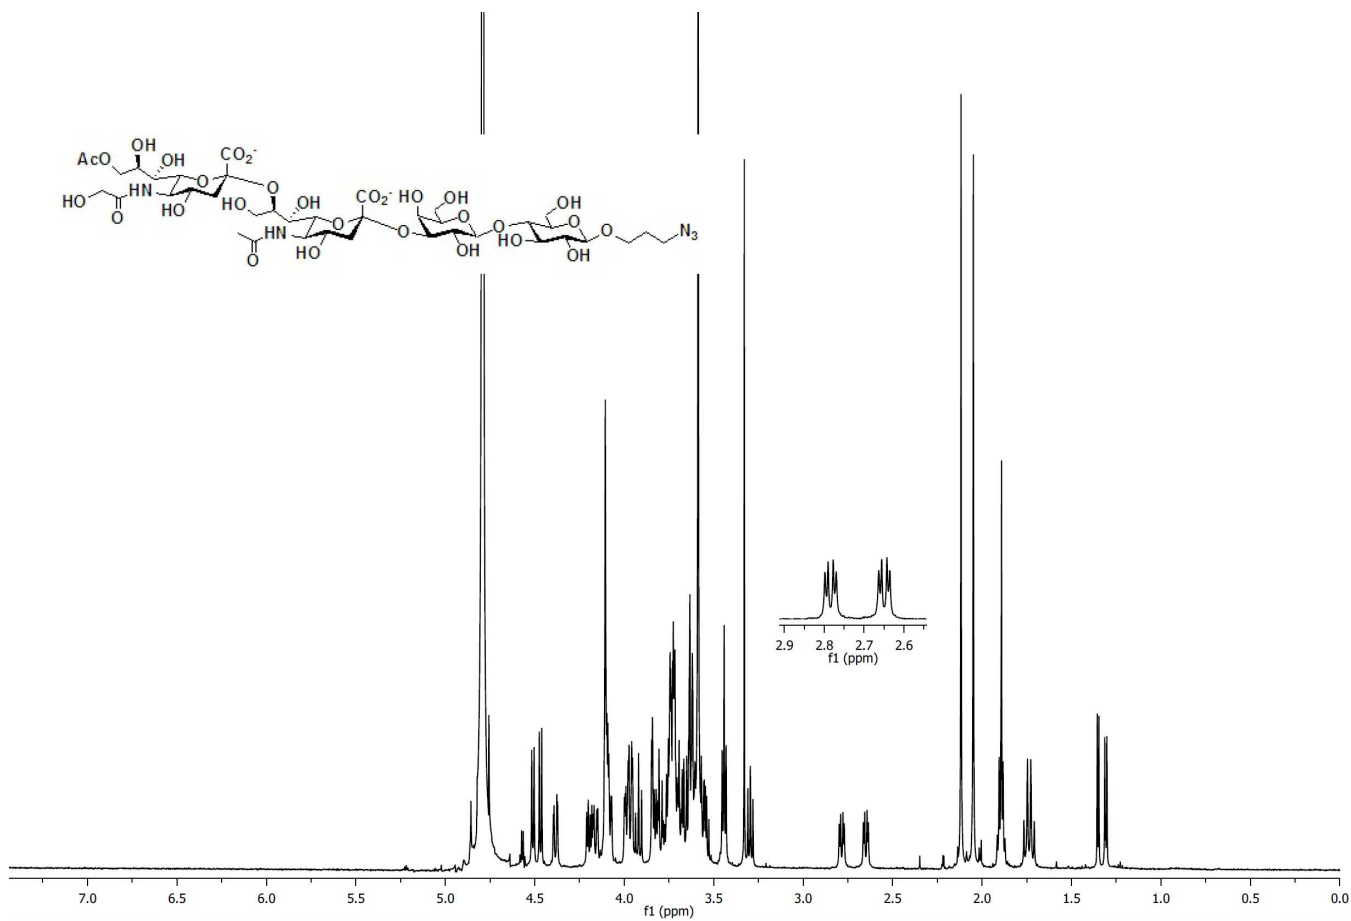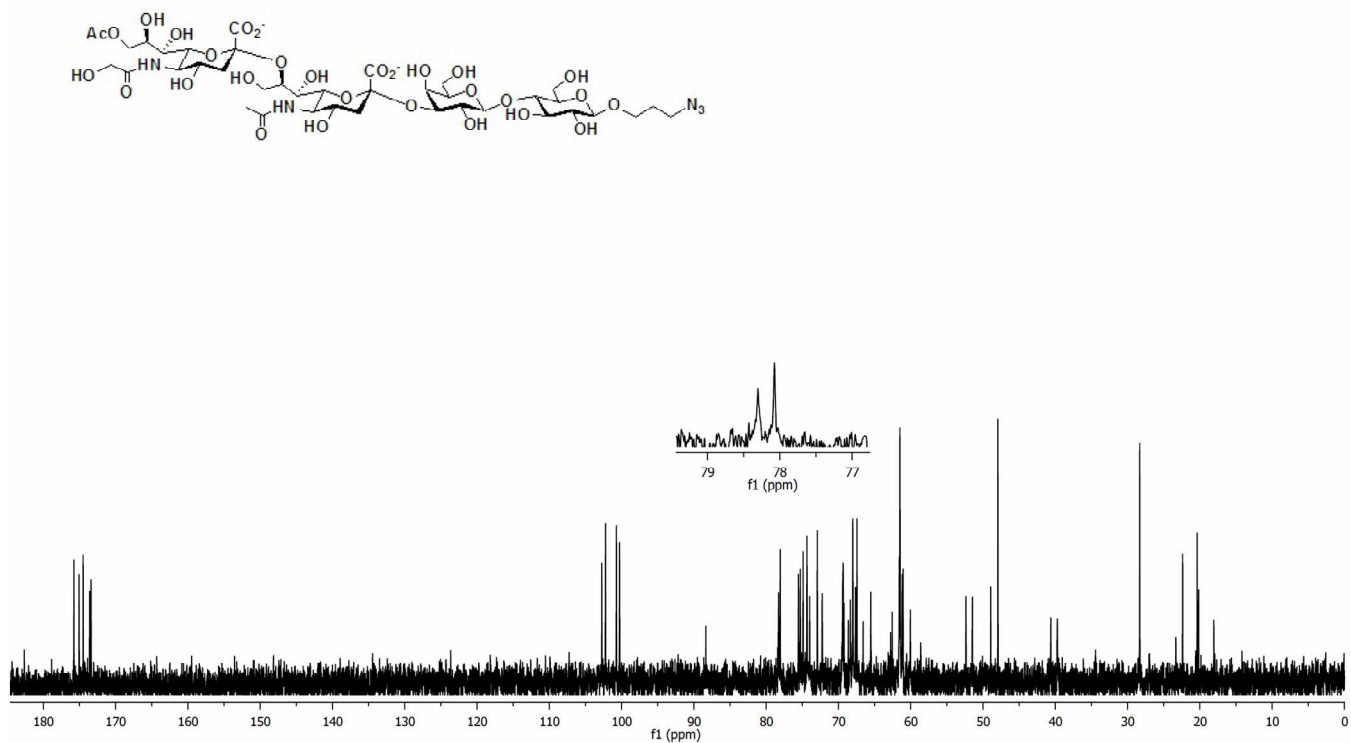

$^1\text{H}$  and  $^{13}\text{C}$  NMR for Neu5Ac $\alpha$ 2-8Neu5Gc $\alpha$ 2-3Lac $\beta$ ProN $_3$  (**20**)

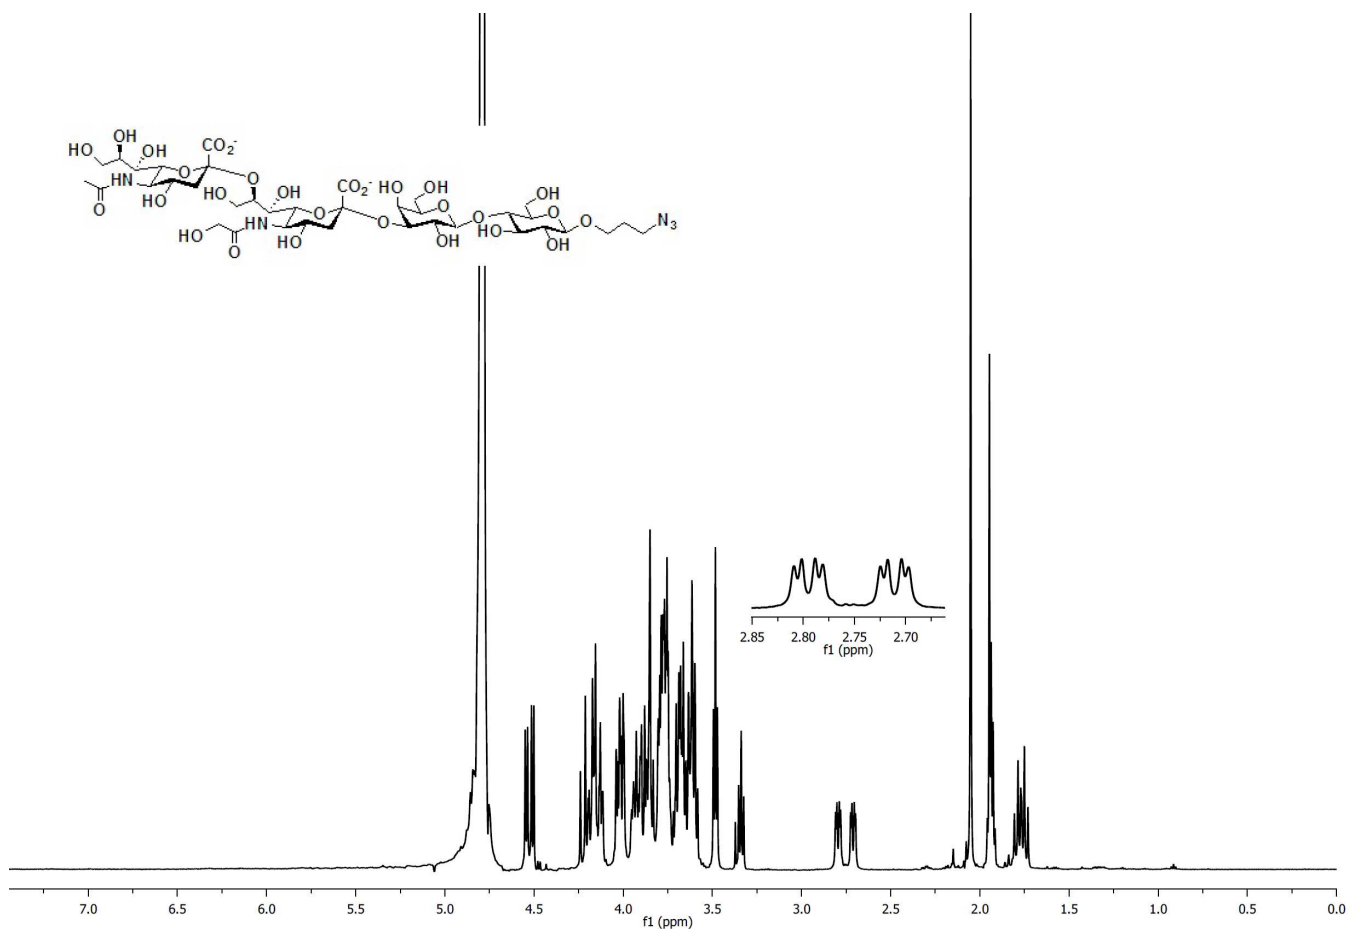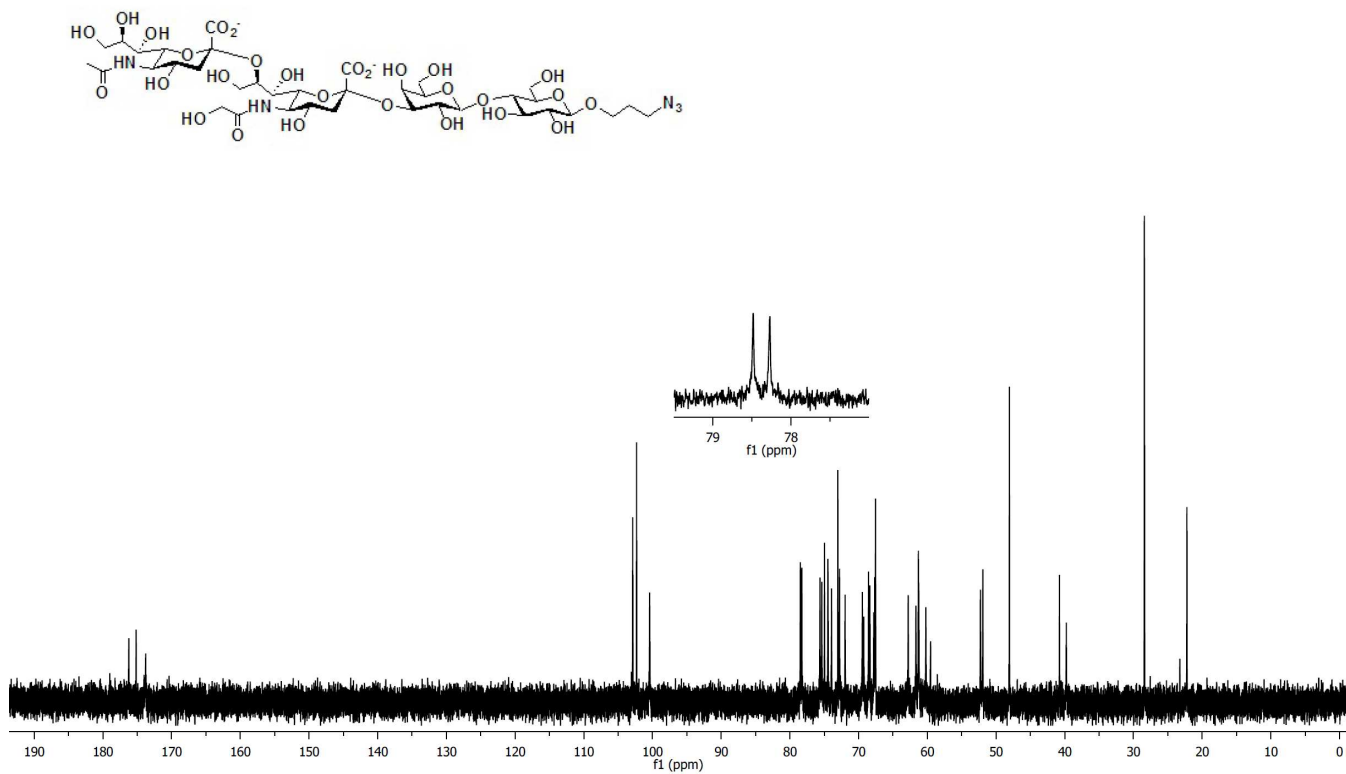

$^1\text{H}$  and  $^{13}\text{C}$  NMR for Neu5Ac $\alpha$ 2-8KDN $\alpha$ 2-3Lac $\beta$ ProN $_3$  (**22**)

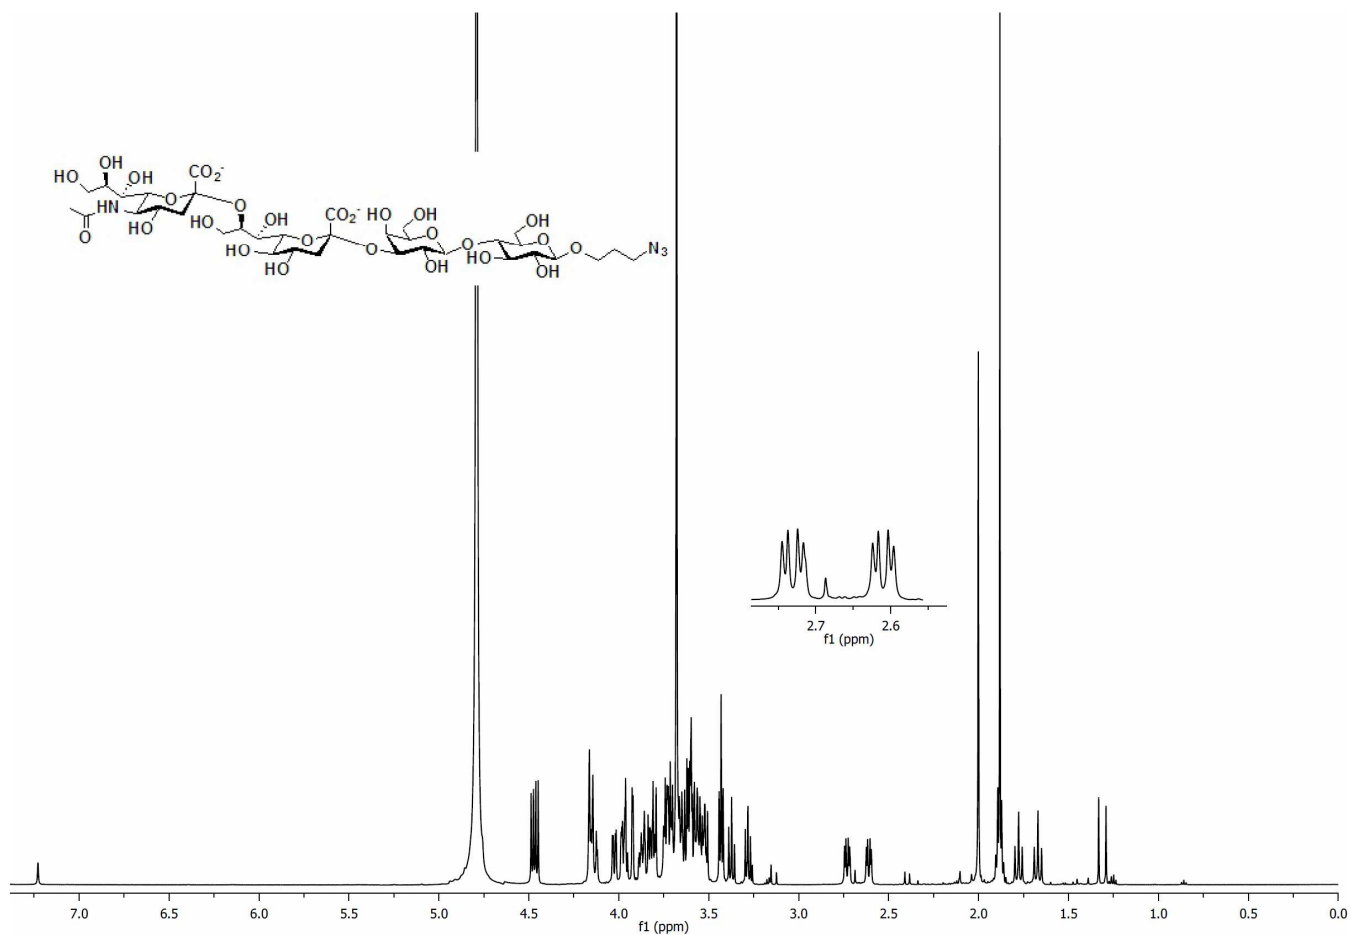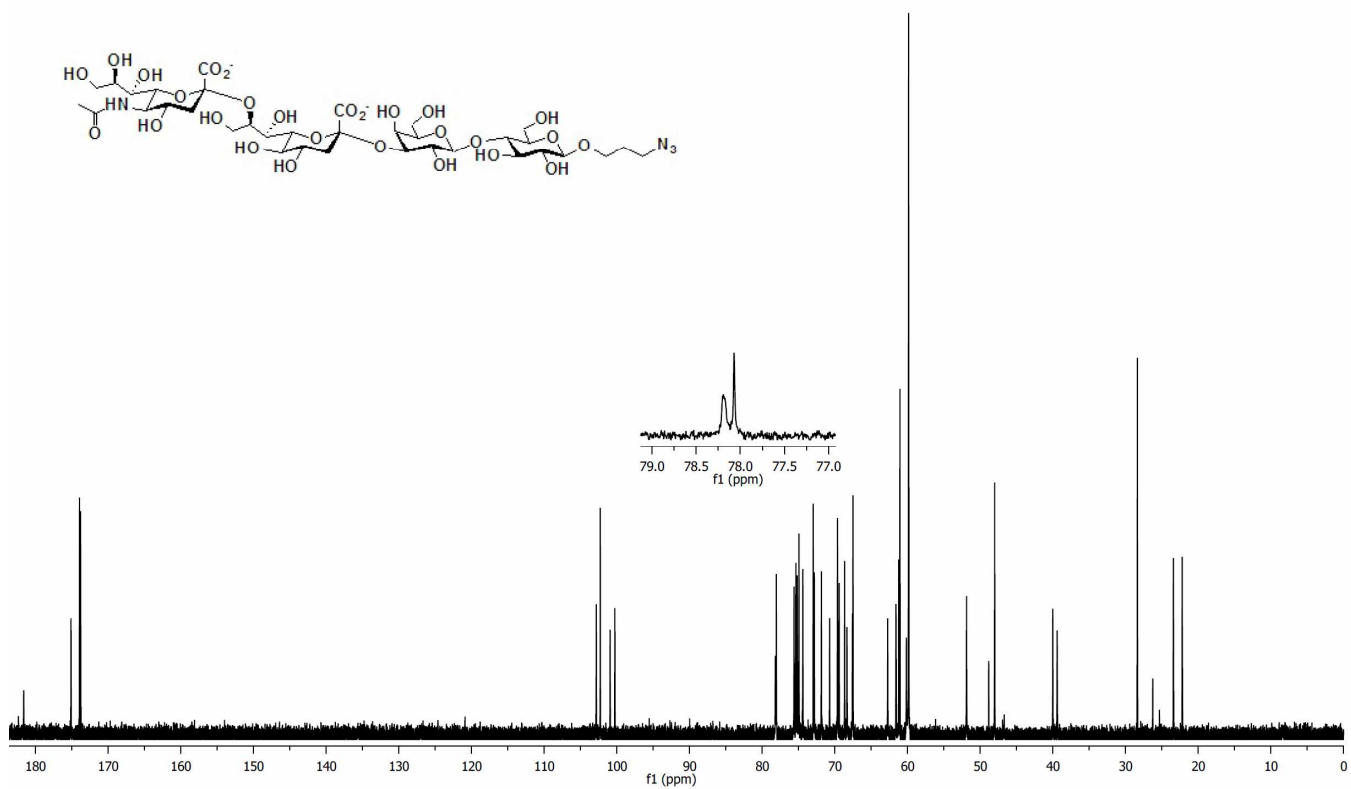

$^1\text{H}$  and  $^{13}\text{C}$  NMR for Neu5Ac $\alpha$ 2-8Neu5Ac9N $_3\alpha$ 2-3Gal $\beta$ OMe (**24**)

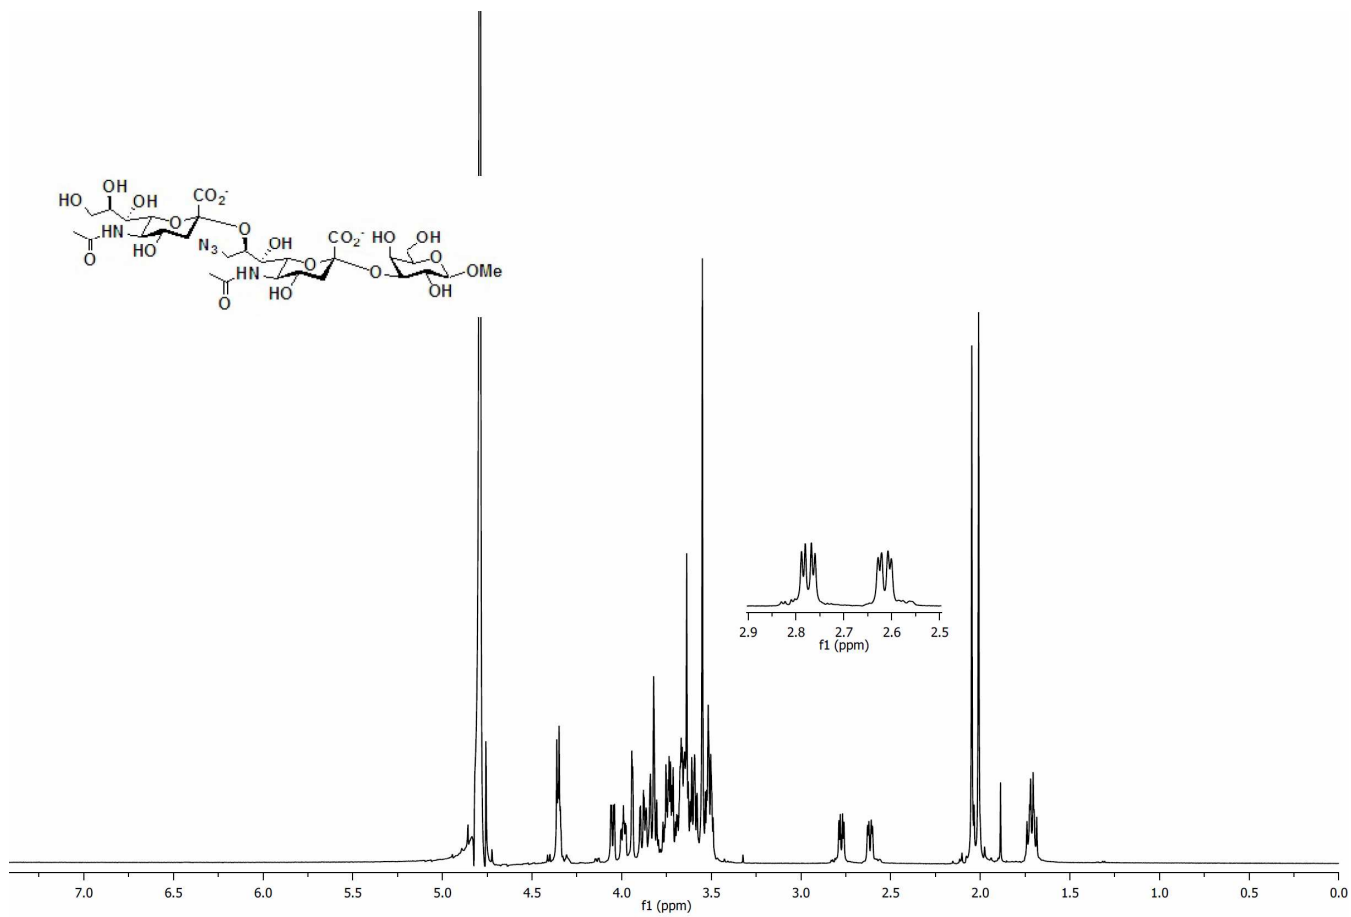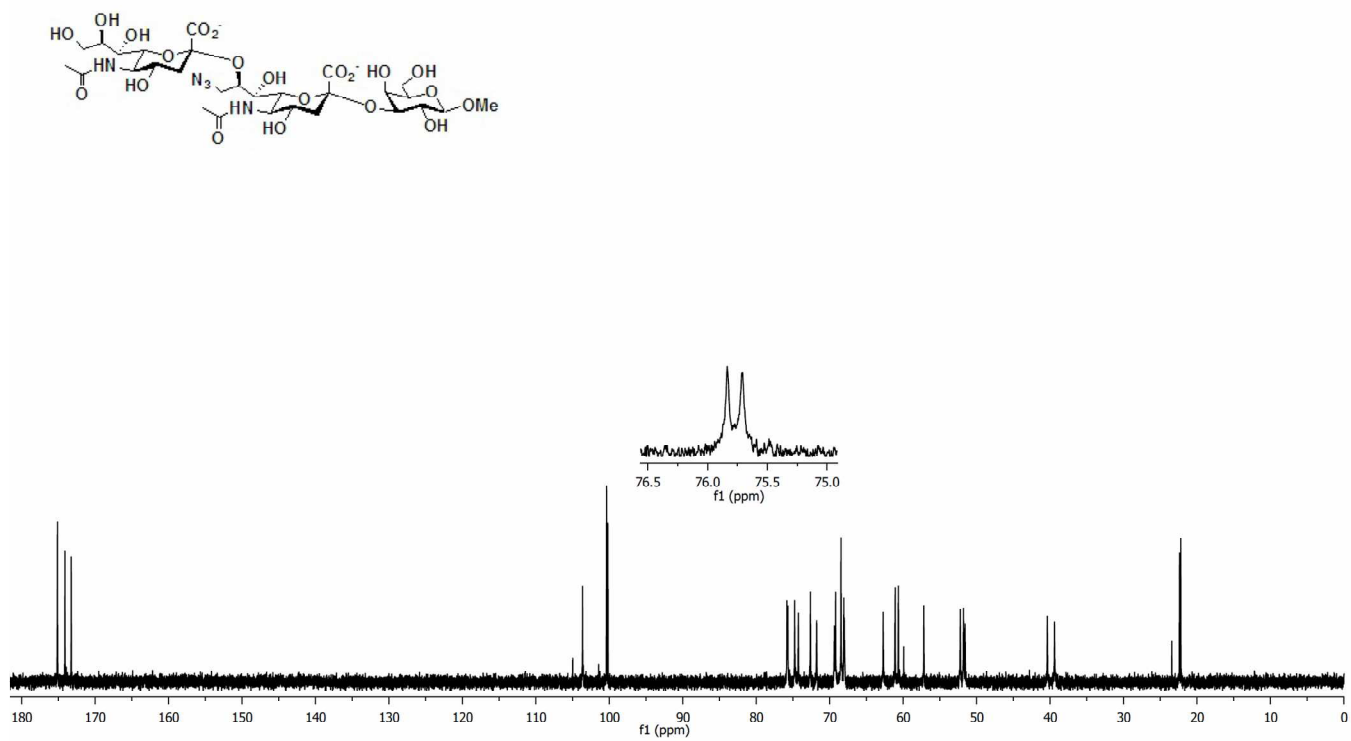

$^1\text{H}$  and  $^{13}\text{C}$  NMR for Neu5Gc $\alpha$ 2-8Neu5Gc $\alpha$ 2-3Lac $\beta$ ProN $_3$  (**28**)

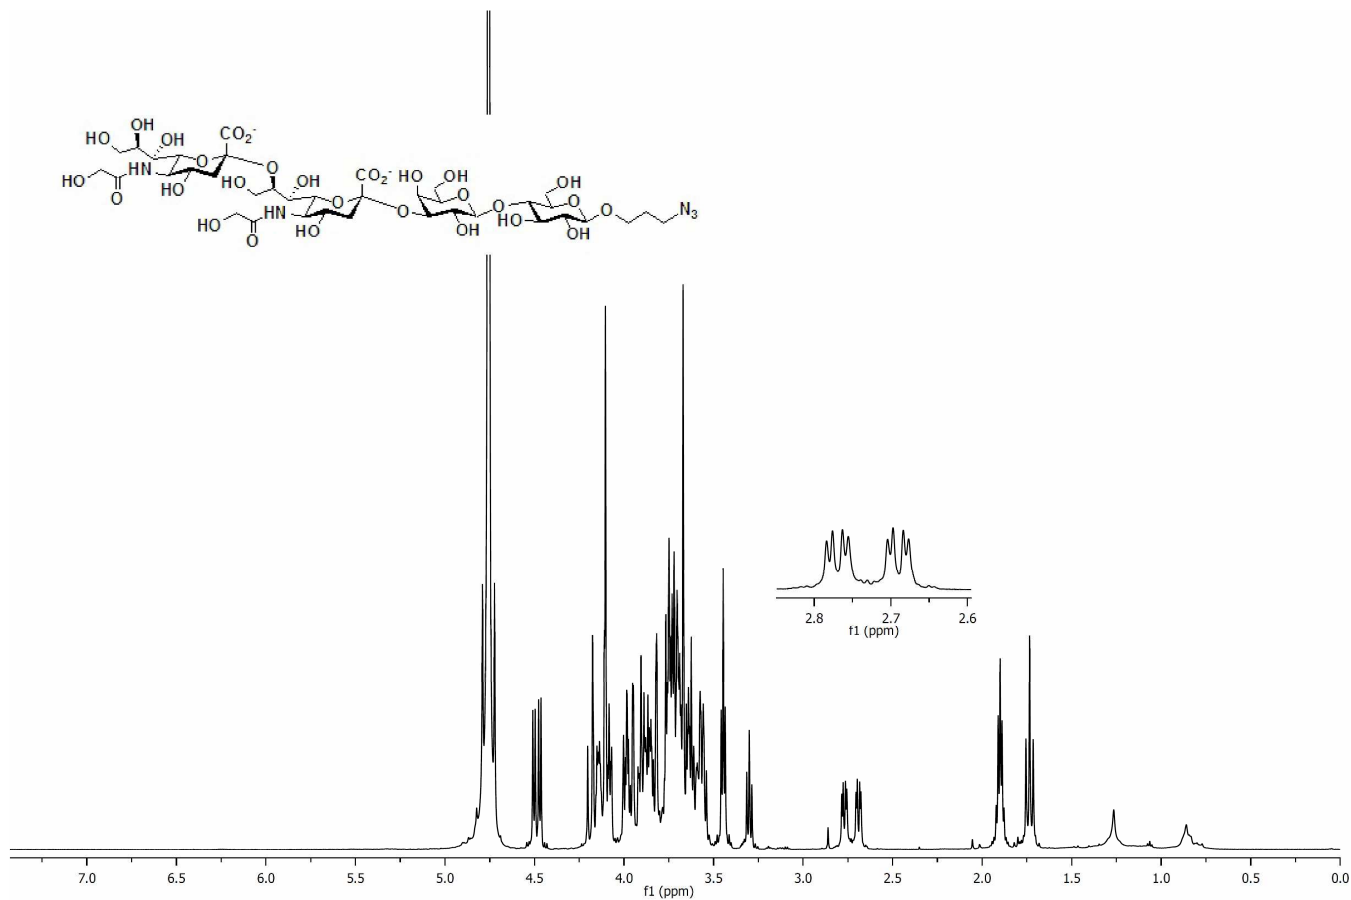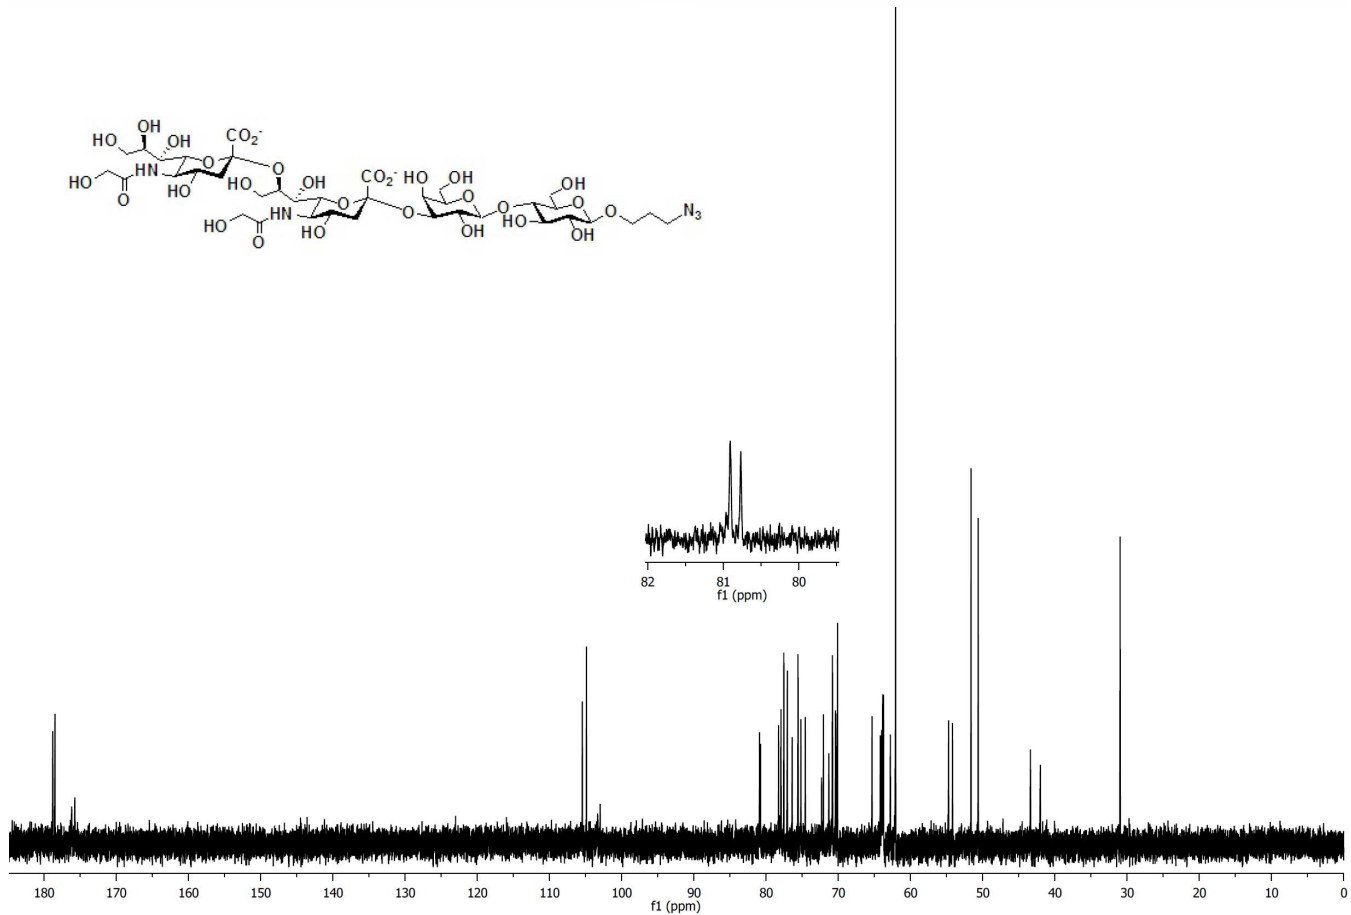

$^1\text{H}$  and  $^{13}\text{C}$  NMR for KDN $\alpha$ 2-8Neu5Gc $\alpha$ 2-3Lac $\beta$ ProN $_3$  (**29**)

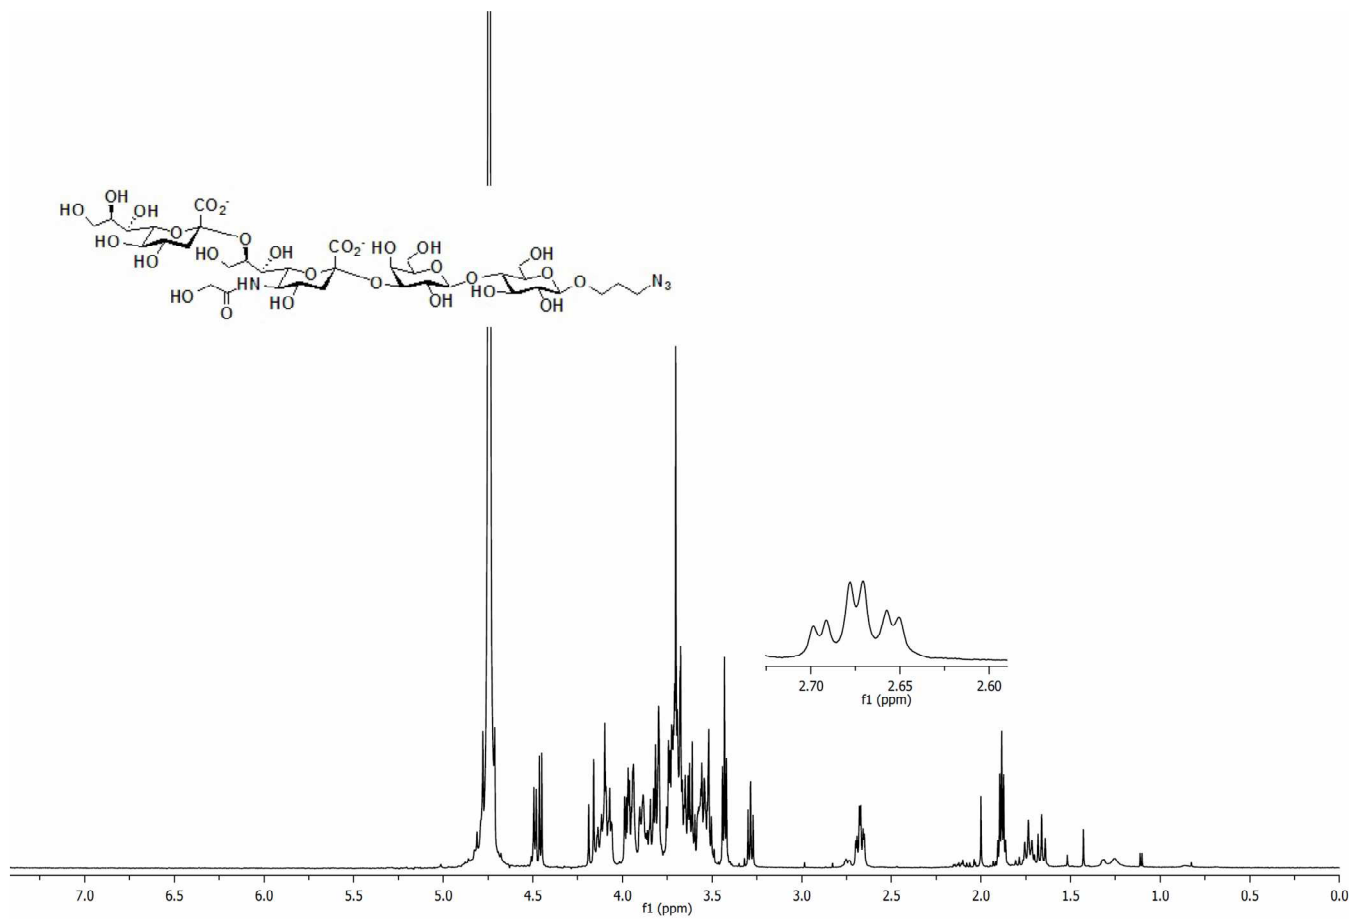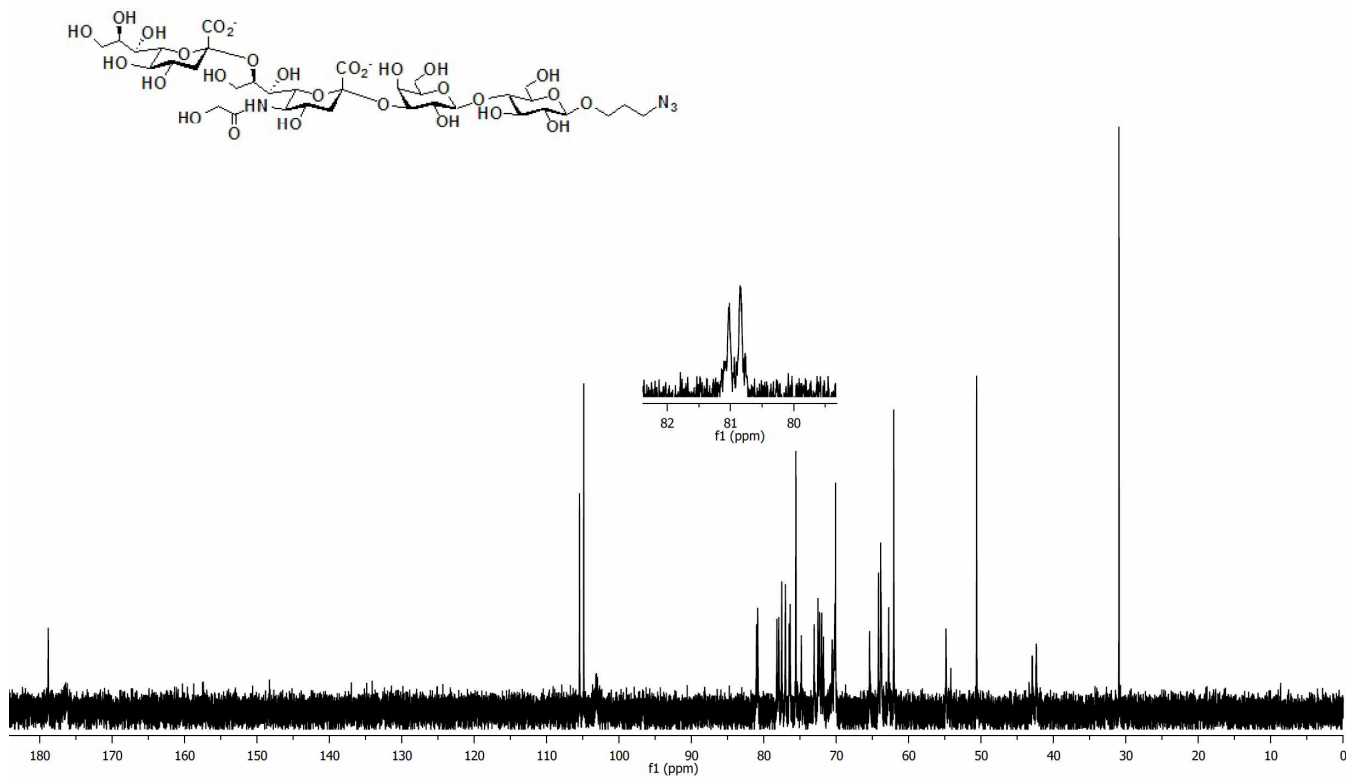



$^1\text{H}$  and  $^{13}\text{C}$  NMR for Neu5Gc $\alpha$ 2-8KDN $\alpha$ 2-3Lac $\beta$ ProN $_3$  (**30**)

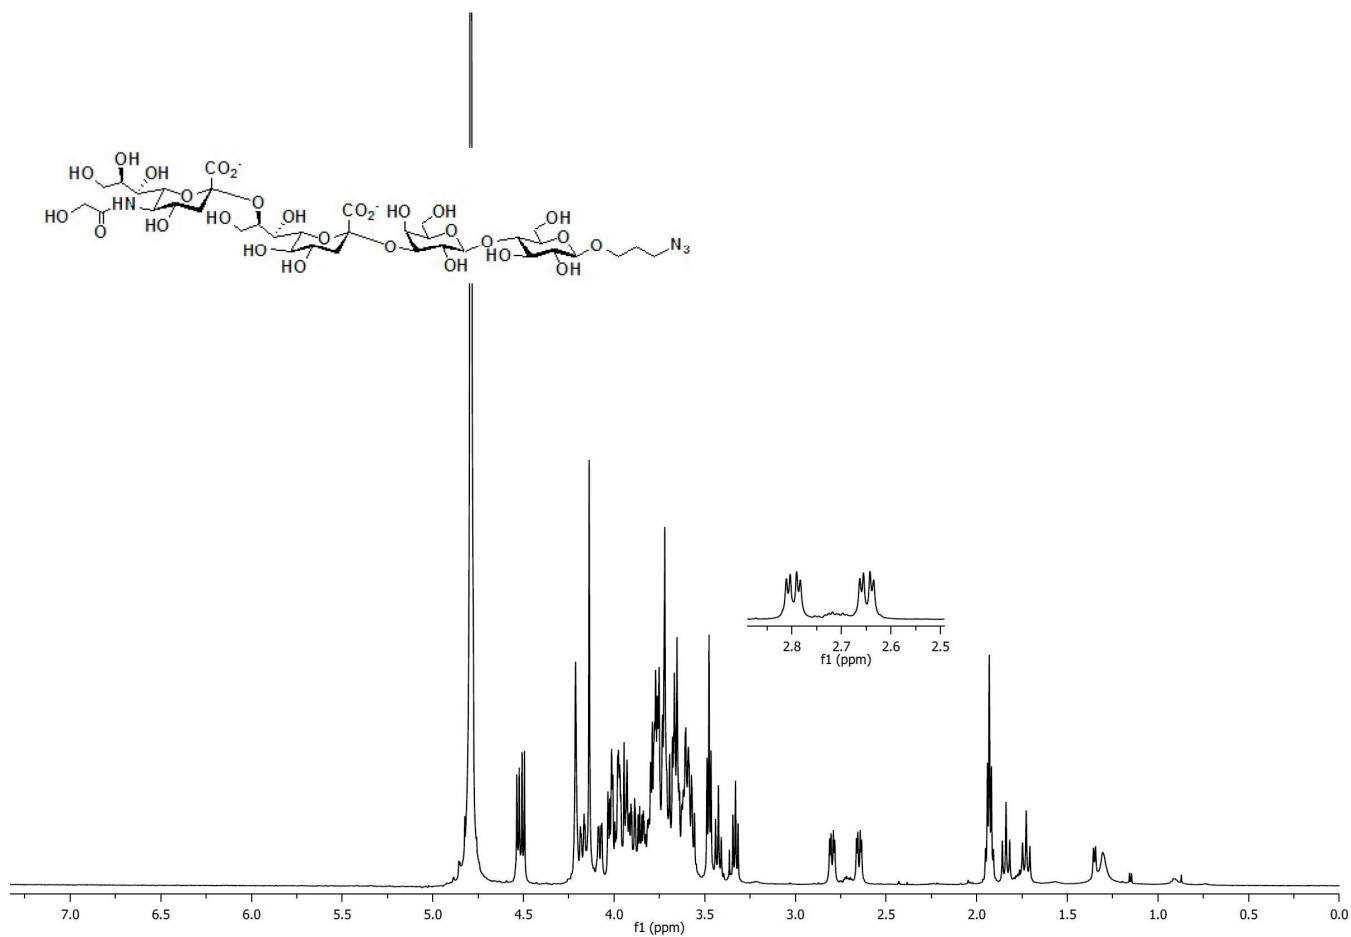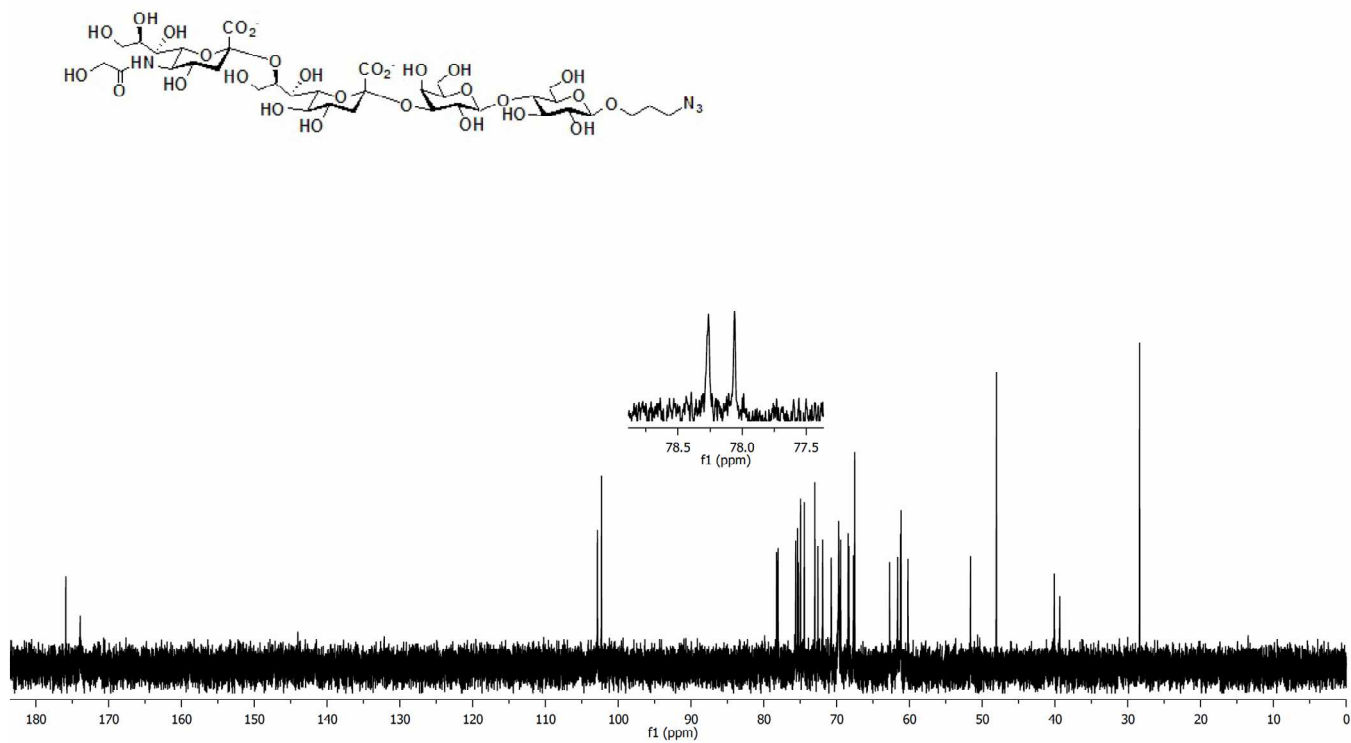

$^1\text{H}$  and  $^{13}\text{C}$  NMR for KDN $\alpha$ 2-8KDN $\alpha$ 2-3Lac $\beta$ ProN $_3$  (**31**)

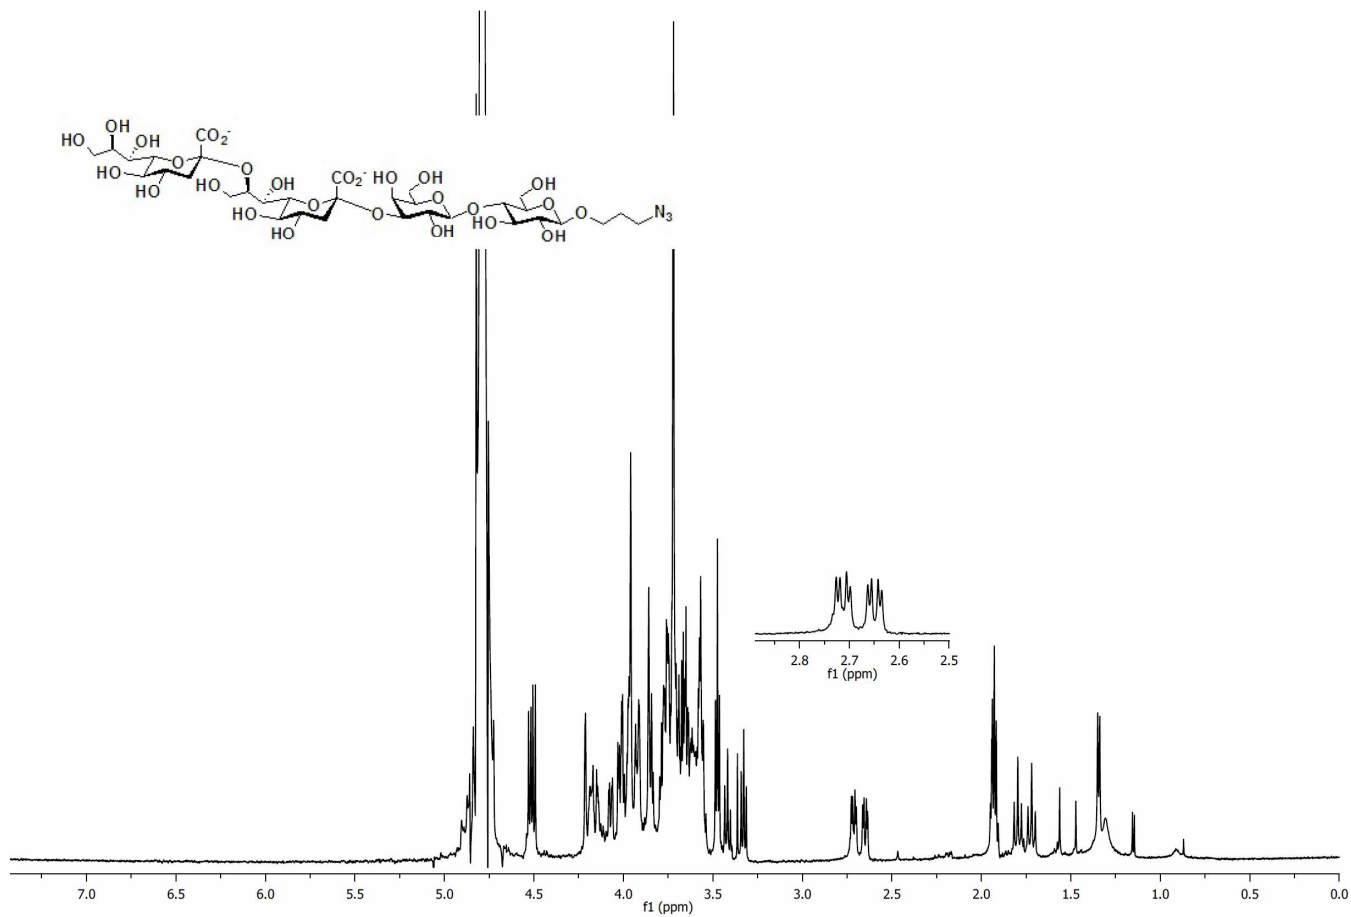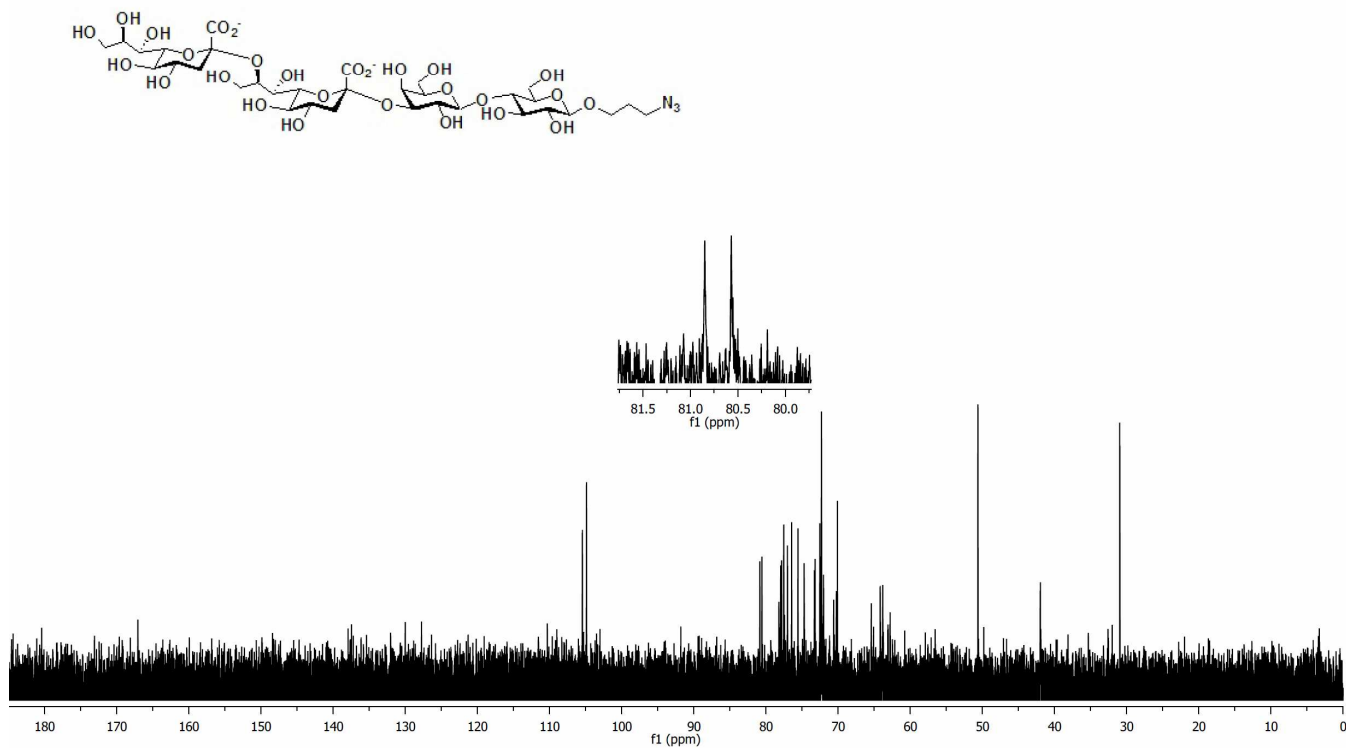

$^1\text{H}$  and  $^{13}\text{C}$  NMR for Neu5Ac $\alpha$ 2-8Neu5Ac $\alpha$ 2-6Lac $\beta$ ProN $_3$  (**34**)

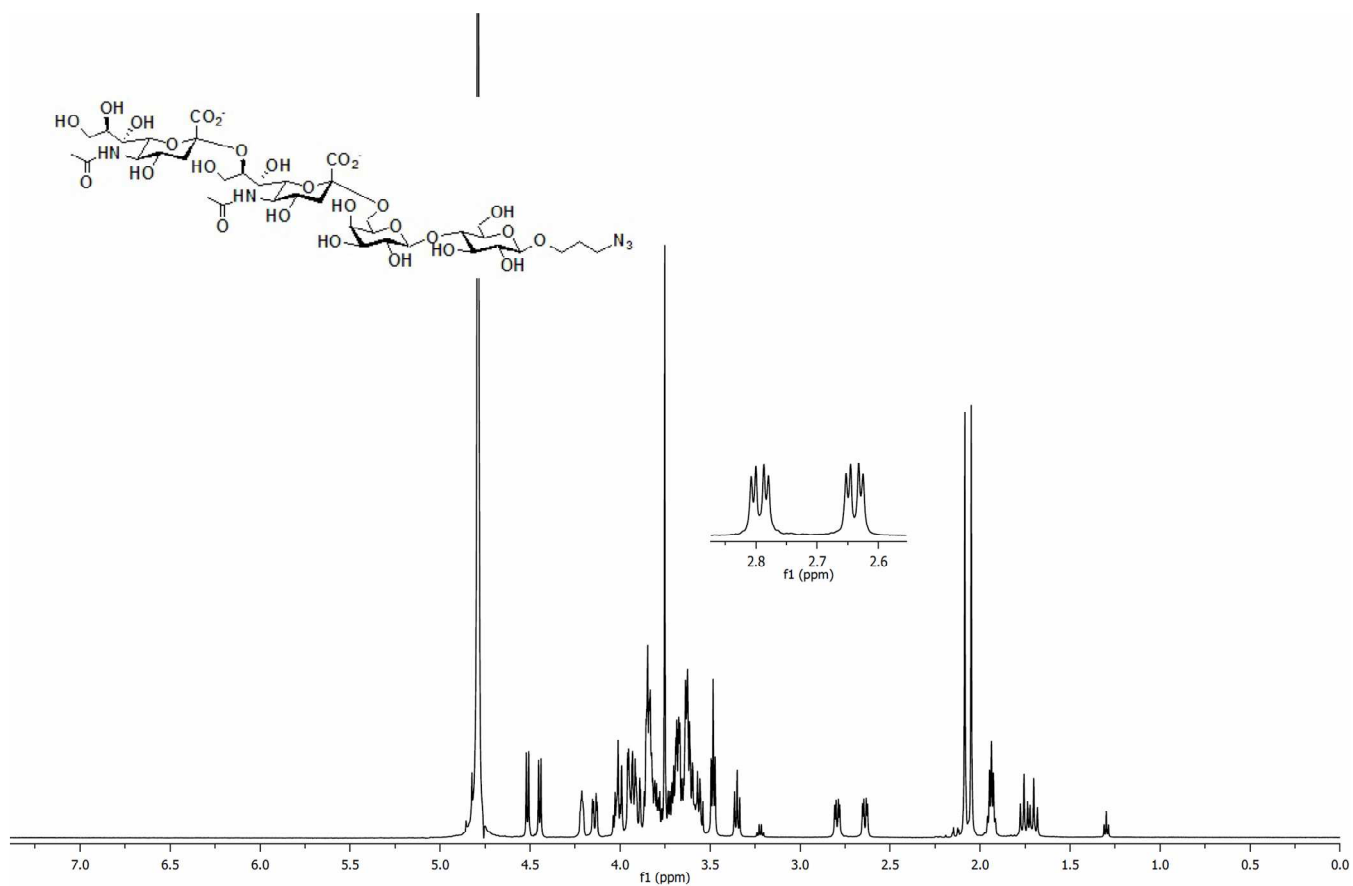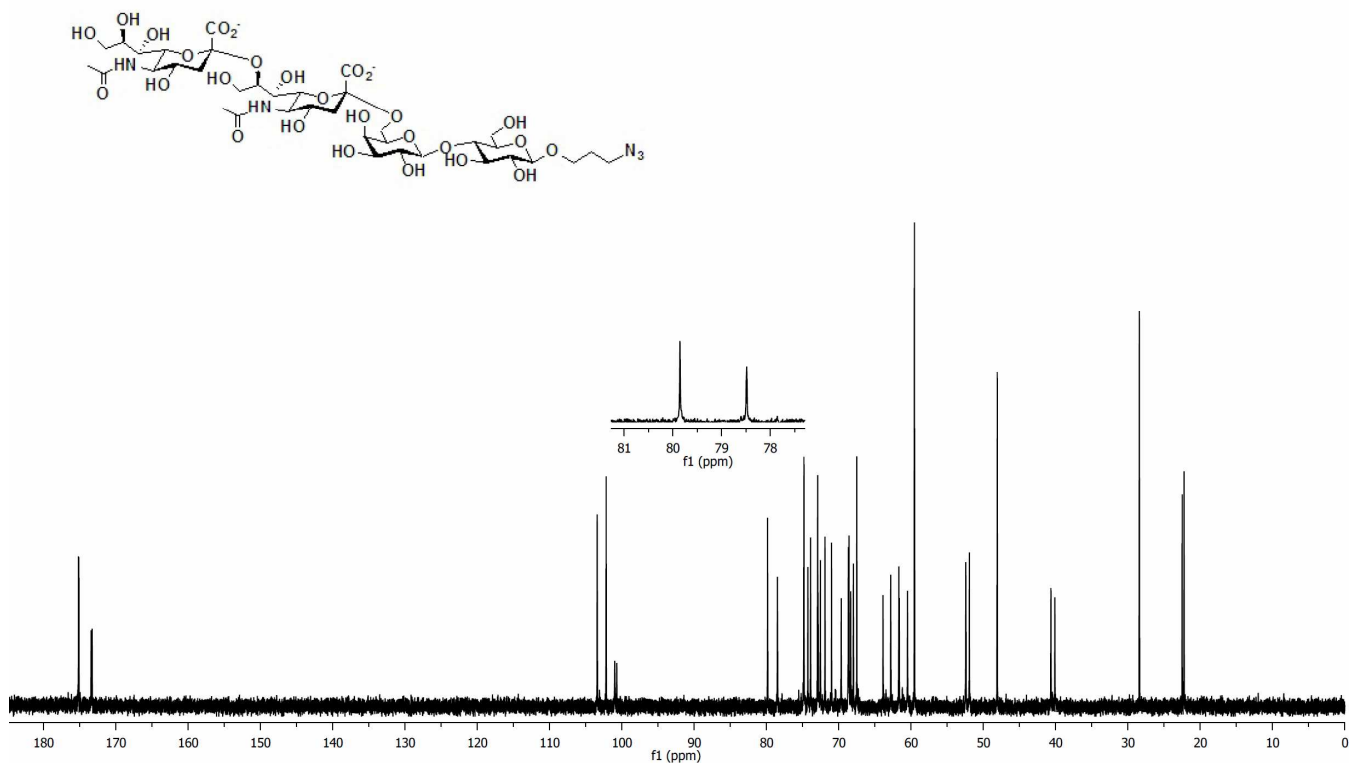

$^1\text{H}$  and  $^{13}\text{C}$  NMR for Neu5Ac $\alpha$ 2-8Neu5Gc $\alpha$ 2-6Lac $\beta$ ProN $_3$  (**36**)

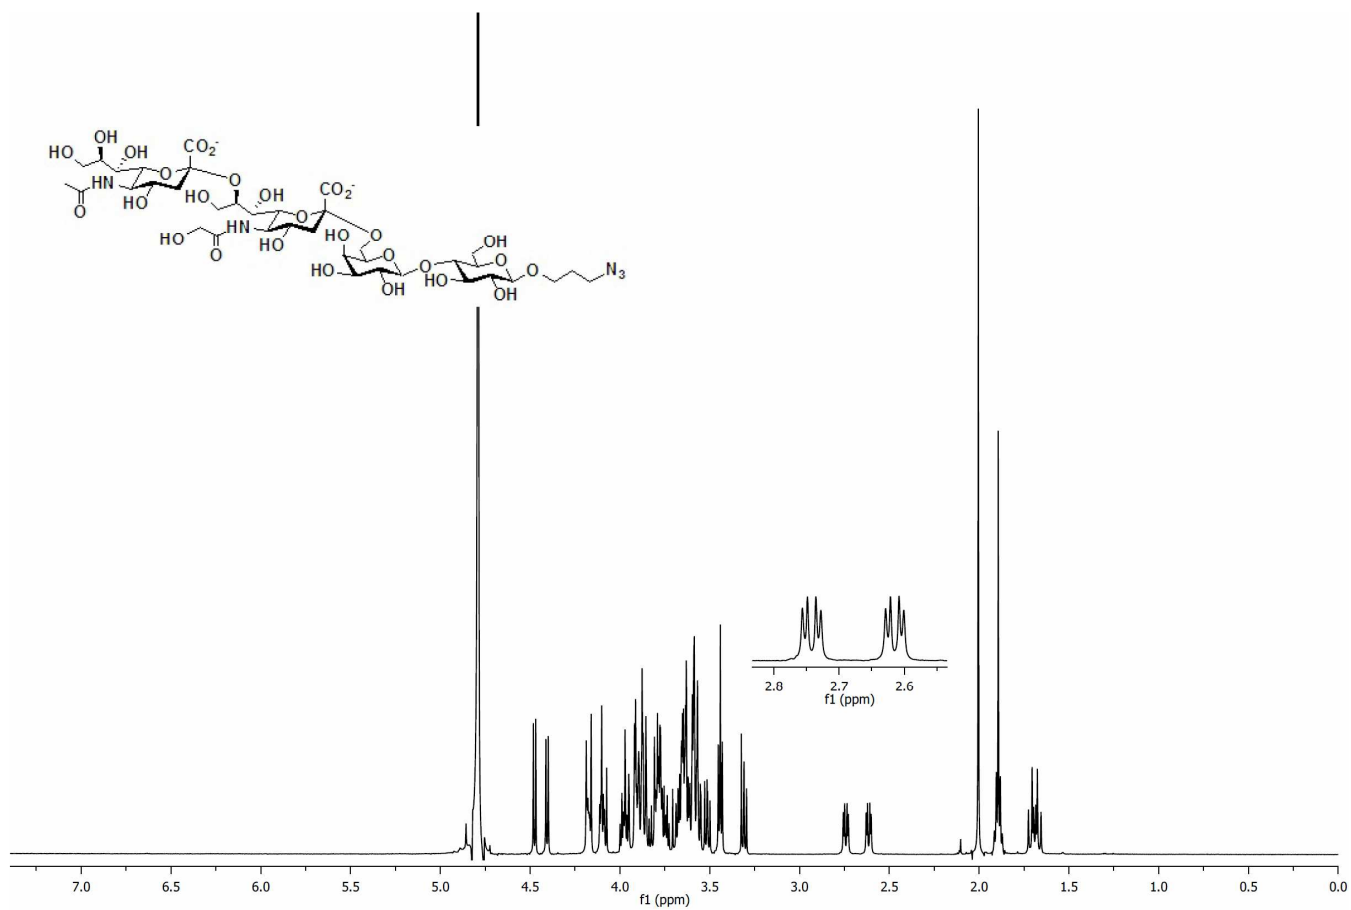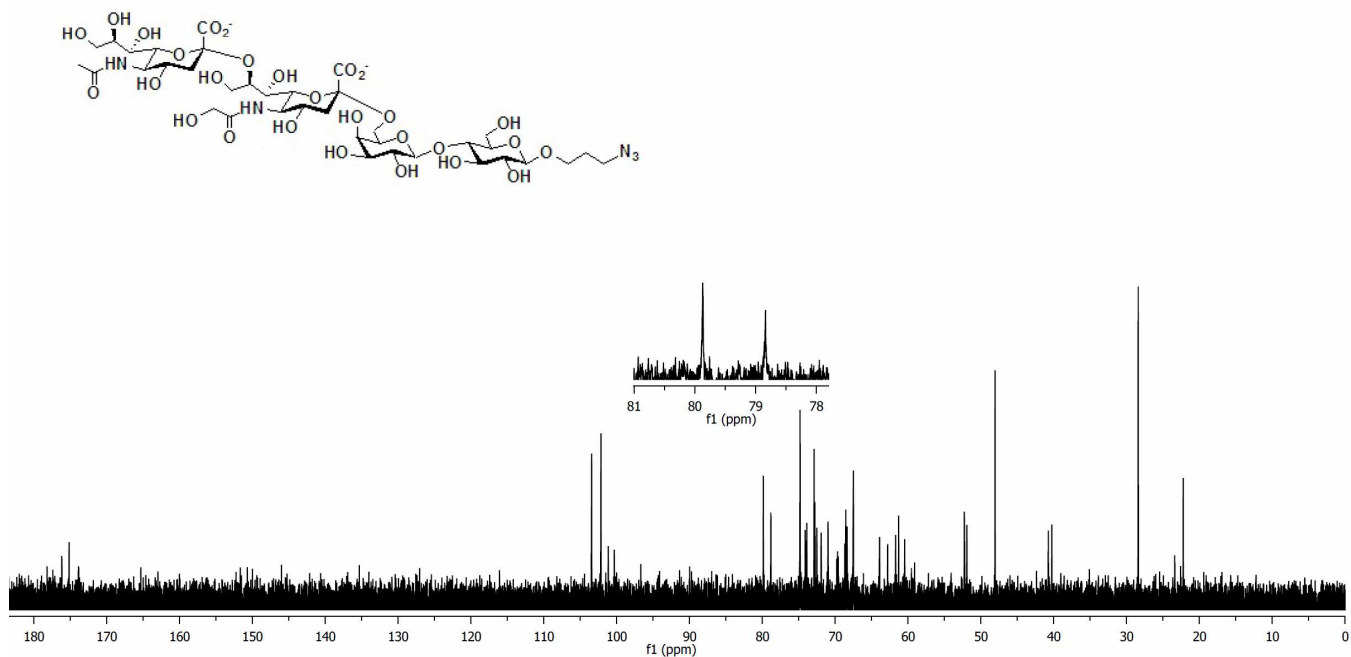

$^1\text{H}$  and  $^{13}\text{C}$  NMR for Neu5Ac $\alpha$ 2-8KDN $\alpha$ 2-6Lac $\beta$ ProN $_3$  (**38**)

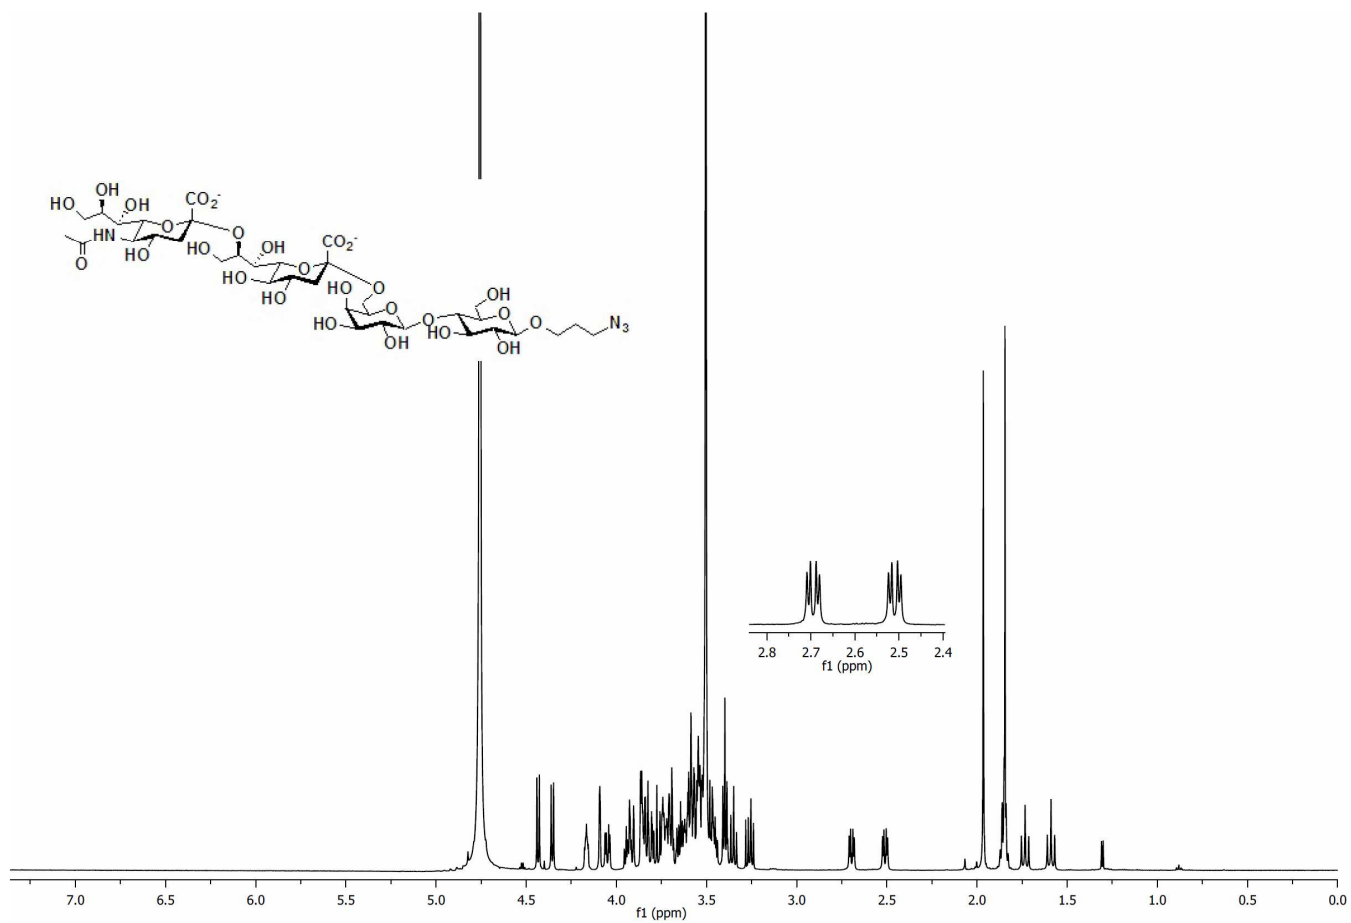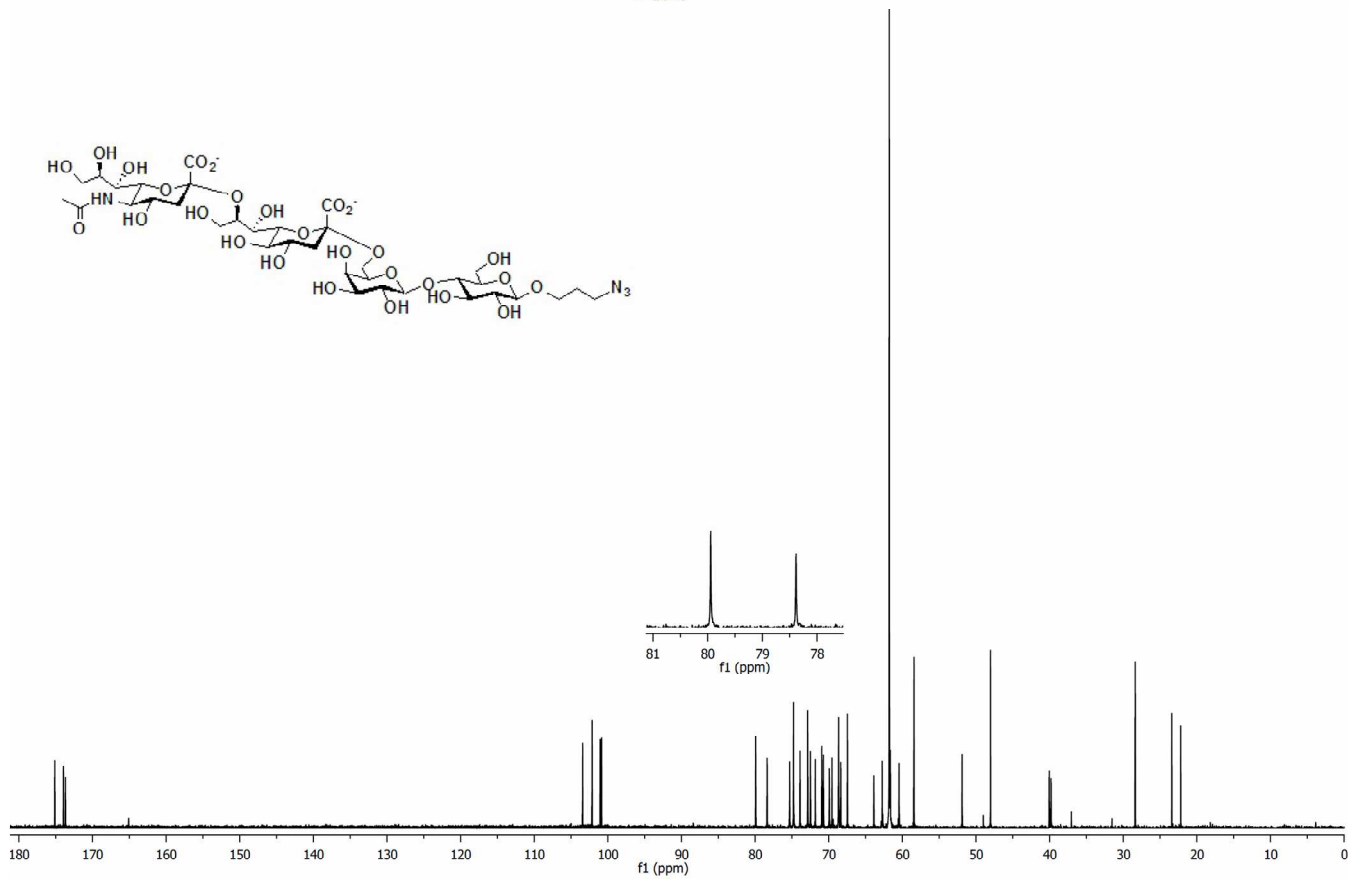

$^1\text{H}$  and  $^{13}\text{C}$  NMR of Neu5Ac $\alpha$ 2-8Neu5Ac9N $_3\alpha$ 2-6Gal $\beta$ OMe (**40**)

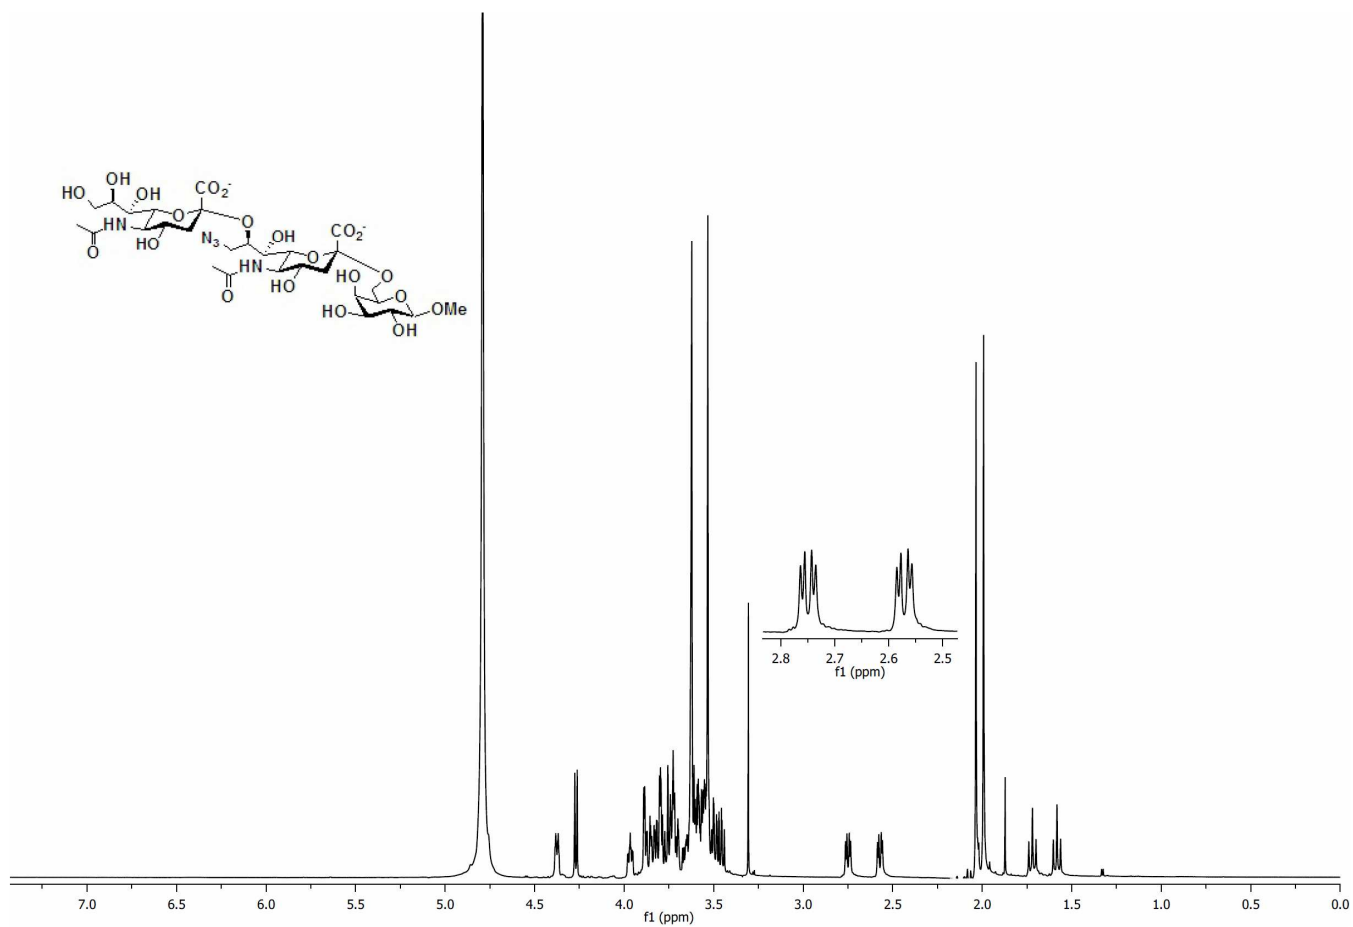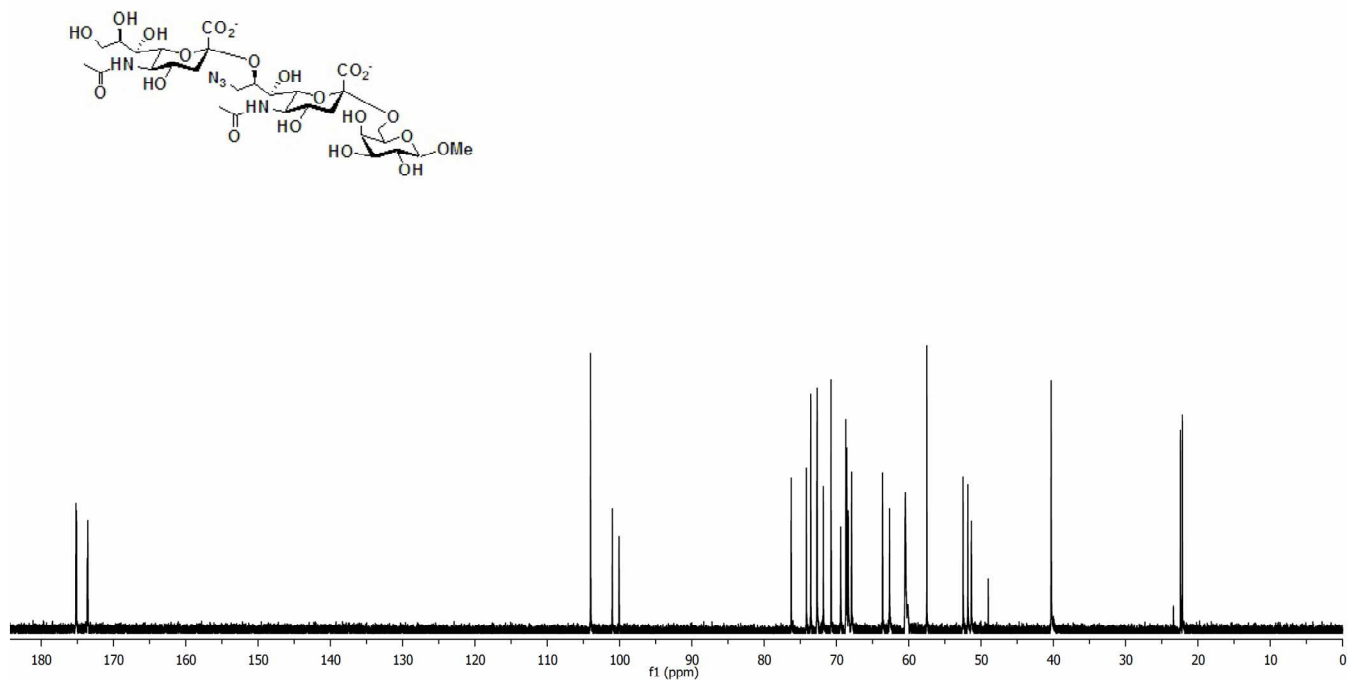

Supplement: NIHMS162520-supplement-1_si_001.pdf [file NIHMS162520-supplement-1_si_001.pdf]
